# Supplementary material for: Determination of the Genome Sequence of Porphyromonas gingivalis Strain ATCC 33277 and Genomic Comparison with Strain W83 Revealed Extensive Genome Rearrangements in P. gingivalis
Source: PubMed Central journal article supplement — DNA Res. 2008 Jun 3;15(4):215–25. doi: 10.1093/dnares/dsn013 (PMC2575886; doi:10.1093/dnares/dsn013), 2008-06-03
Supplement: dsn013_1.pdf [file dsn013_1.pdf]

## Supplementary figure legends

### Supplementary Figure 1

Alignment of the nucleotide sequences of MITE700 elements identified in the ATCC 33277 genome. Asterisks indicate the nucleotides conserved in all the MITE700 elements.

### Supplementary Figure 2

Alignment of the nucleotide sequences of MITE*PgRS* elements identified in the ATCC 33277 genome. Terminal inverted repeats (IRs), Repeat A, Repeat B, and Repeat C regions are indicated. A unique nucleotide sequence detected in MITE*PgRS*\_08 is underlined.

### Supplementary Figure 3

The *rrn* operons on *P. gingivalis* chromosomes. (A) Locations of the *rrn* operons (arrow heads) and the PCR primers used to examine each *rrn*-flanking region (arrows) on the ATCC 33277 and W83 chromosomes are shown. The *dnaA* gene is located at the top of each chromosome circle. (B) Structures of *rrn* operon-flanking regions of ATCC 33277, W83, TDC60, TDC117, TDC275, SU63 and GAI7802 were examined by PCR using a set of orientation-specific primer pairs indicated in panel (A) (primer sequences are available in Supplementary Table 1). PCR products were separated on a 0.8% agarose gel and visualized by ethidium bromide staining.

### Supplementary Figure 4

Comparison of the loci for capsular polysaccharide synthesis of strains ATCC 33277, W83 and 381. All the CDSs on the ATCC 33277 and W83 chromosomes are drawn to scale. Strain 381 contains a nearly identical capsular polysaccharide synthesis locus as that of ATCC 33277 except that a CDS corresponding to PGN\_0223 has been truncated by a premature stop codon. Amino-acid sequence identities (%) are also indicated between homologous CDSs.

### Supplementary Figure 5

Comparison of the nucleotide sequences of the *glk* genes in seven *P. gingivalis* strains. (A) Schematic presentation of the *glk* genes of seven *P. gingivalis* strains. (B) Nucleotides conserved in all the seven strains are indicated by asterisks below the alignment. Bold nucleotides indicate silent substitutions. Nucleotide substitutions which cause amino acid substitutions or nonsense mutations are highlighted. Locations of the ribosome-binding sequence (SD) and start and stop codons of *glk* are also indicated. MITE239 inserted into the the *glk* gene in strain ATCC 33277 and the CDSs located just upstream and downstream of the *glk* gene are indicated by lines, the terminal inverted repeats (IRs) of MITE239 by boxes, and the target site duplication generated by the MITE239 insertion by double lines.

IR 12 bp variable region

1 \* \* \* \* \* 120

MITE700\_01 ACGTCA--TTCGACGTA AAAAATGCCAATGTATCGTTCCTGATTACGCGTTACACACTAAGATCTGGGAGTTATAGTTGTTCGCTCCGGCAATTCATAGGGGCAACTCTGCT

MITE700\_05 ACGTCAGTTCGGCTAAGAAAACGCCAATGTATCGTTCCTGATTAGGTTAACGCCTAACAATTTGTATGTTATAGGTTGTACCGTTCAGGCAATGTATAGGGGCAACTCTGCT

MITE700\_02 ACCTCAGTTCGGCTAAGAAAACGCCAATGTATCGTTCCTGATTACGCGTTAACGCCTAATAATTTGGATGTTATAGGTTGTTCGCTTCAGGCAATGTATAGGGGCAACTCTGCT

MITE700\_04 ACCTCAGTTCGGCTAAGAAAACGCCAATGTATCGTTCCTGATTACGCGTTAACGCCTAATAATTTGGATGTTATAGGTTGTTCGCTTCAGGCAATGTATAGGGGCAACTCTGCT

MITE700\_12 ACCTCAGTTCGACGTAAAGAAAACGCCAATGAATAATCTTTTCTCGTACAGAGATTGATGCCCTAAGATTC-----TCCGCCAAATGTATAGGGG--TATCCGCT

MITE700\_13 ACCTCAGTTCGACGTAAAGAAAACGCCAATGAATAATCTTTTCTCGTACAGAGATTGATGCCCTAAGATTC-----TCAGACAA-----ATAGGGG--TACCCTGCT

MITE700\_14 -----

MITE700\_08 -----

MITE700\_07 -----

MITE700\_03 ATGTCAGTTCGATCAAGGCCAAATAGGAAGTTGGGTCTGGTCSAAGTCAAGCTAAGCTA-----

MITE700\_11 -----

MITE700\_06 -----

121 \* \* \* \* \* 240

MITE700\_01 TCTGCCGGATCGACCAACATGAAATTCGGATTG--TTTITGACGATGTTGCAGTCCGTACAGGAAGATGGGCTATACCAAGGGCA--CATGGCACTACTCCGTACAGATGACGG

MITE700\_05 TTTGCTTGGATCGAACACAAATGAAATTCGGATTGCTTTT--GACAGAATGTTGCAGTCCGCACAGGAAGATGGGCTATACCATAGGGCAAGATGGCGTACTCCGTAGAGGATGACGG

MITE700\_02 TCTGCCGTGGATCGAACACAAATGAAATTCGGATTGCTTTT--TGACCAATGTTGCAGTCCGCACAGGAAGATGGGCTATACCAACAAGGCA--GATGGCGTACACCGTACAGGATAACGG

MITE700\_10 TCTGCTTGGATCGAACACAAATGAAATTCGGATTGCTTTT--GACCAATGTTGCAGTCCGCACAGGAAGATGGGCTATACCAACAAGGCA--GATGGCGTACACCGTACAGGATAACGG

MITE700\_04 TCTGCTTGGATCGAACACAAATGAAATTCGGATTGCTTTT--GACCAATGTTGCAGTCCGCACAGGAAGATGGGCTATACCATAGGGCAAGATGGCGTACTCCGTACAGGATGATGG

MITE700\_12 TCTGCTTGGATCGAACACAAATGAAATTCGGATTGCTTTT--TGACCAATGTTGCAGTCCGCACAGGAAGATGGGCTATACCATAGGGCAAGATGGCGTACTCCGTACAGGATGATGG

MITE700\_13 -----

MITE700\_14 -----

MITE700\_08 -----

MITE700\_07 -----

MITE700\_03 -----CTATGCCACAAGGCA--GATGGCGTATTCGATAGGATGATGA

MITE700\_11 -----TCCGAACAGGAAGATGGGCTATACCAAGGGCA--GATGGTGTACTCCGTAGAGGATAACGG

MITE700\_06 -----GGGCTATACCATAGGG--AGCATGGCGGTATCCGATAGGATGACGA

241 \* \* \* \* \* 360

MITE700\_01 GCTATCCGTCACAGCTTCTCGAGGTACGCTGTAGAGCTCGGGAGGTAACGCTCTACAGCGTAGCGGACGAGCCGTAGAGTTCGCTTCGCTGAGCCGTAGAG-----GTGCCGAGCTGAG

MITE700\_05 GCTATCCGTCACAGCTTCTCGAGGTACGCTGTAGAGCTCGGGAGGTAACGCTCTACAGCGTAGCGGACGAGCCGTAGAGTTCGCTTCGCTGAGCCGTAGAG-----GTGCCGAGCTGAG

MITE700\_09 GCTATCCGTCACAGCTTCTCGAGGTACGCTGTAGAGCTCGGGAGGTAACGCTCTACAGCGTAGCGGACGAGCCGTAGAGTTCGCTTCGCTGAGCCGTAGAG-----GTGCCGAGCTGAG

MITE700\_02 GCTATCCGTCACAGCTTCTCGAGGTACGCTGTAGAGCTCGGGAGGTAACGCTCTACAGCGTAGCGGACGAGCCGTAGAGTTCGCTTCGCTGAGCCGTAGAG-----GTGCCGAGCTGAG

MITE700\_10 GCTATCCGTCACAGCTTCTCGAGGTACGCTGTAGAGCTCGGGAGGTAACGCTCTACAGCGTAGCGGACGAGCCGTAGAGTTCGCTTCGCTGAGCCGTAGAG-----GTGCCGAGCTGAG

MITE700\_04 GCTATCCGTCACAGCTTCTCGAGGTACGCTGTAGAGCTCGGGAGGTAACGCTCTACAGCGTAGCGGACGAGCCGTAGAGTTCGCTTCGCTGAGCCGTAGAG-----GTGCCGAGCTGAG

MITE700\_12 GCTATCCGTCACAGCTTCTCGAGGTACGCTGTAGAG-----

MITE700\_13 GCTATCCGTCACAGCTTCTCGAGGTACGCTGTAGAGCTCGGGAGGTAACGCTCTACAGCGTAGCGGACGAGCCGTAGAGTTCGCTTCGCTGAGCCGTAGAG-----GTGCCGAGCTGAG

MITE700\_14 -----

MITE700\_08 -----

MITE700\_07 -----

MITE700\_03 GCTATCCC-----

MITE700\_11 ACTATCCGTCACAGCTTCTCGAGGTACGCTGTAGAGCTCGGGAGGTAACGCTCTACAGCGTAGCGGACGAGCCGTAGAGTTCGCTTCGCTGAGCCGTAGAG-----GTGCCGAGCTGAG

MITE700\_06 GCTATCCGTCACAGCTTCTCGAGGTACGCTGTAGAGCTCGGGAGGTAACGCTCTACAGCGTAGCGGACGAGCCGTAGAGTTCGCTTCGCTGAGCCGTAGAG-----GTGCCGAGCTGAG

361 \* \* \* \* \* 480

MITE700\_01 CCGTAGAGCCCGGCGGGTACGCTACAGCGTAGCTCGAAGGGCCGTAGAGCCGAGCTCGGTACGCTCTACGGCGTAGCCGAGTCCGTTAGGGCTAGCTCGACCCCTTTCGGGCT

MITE700\_05 CCGTAGAGCCCGGCGGGTACGCTACAGCGTAGCTCGAAGGGCCGTAGAGCCGAGCTCGGTACGCTCTACGGCGTAGCCGAGTCCGTTAGGGCTAGCTCGACCCCTTTCGGGCT

MITE700\_09 CCGTAGAGCCCGGCGGGTACGCTACAGCGTAGCTCGAAGGGCCGTAGAGCCGAGCTCGGTACGCTCTACGGCGTAGCCGAGTCCGTTAGGGCTAGCTCGACCCCTTTCGGGCT

MITE700\_02 CCGTAGAGCCCGGCGGGTACGCTACAGCGTAGCTCGAAGGGCCGTAGAGCCGAGCTCGGTACGCTCTACGGCGTAGCCGAGTCCGTTAGGGCTAGCTCGACCCCTTTCGGGCT

MITE700\_10 CCGTAGAGCCCGGCGGGTACGCTACAGCGTAGCTCGAAGGGCCGTAGAGCCGAGCTCGGTACGCTCTACGGCGTAGCCGAGTCCGTTAGGGCTAGCTCGACCCCTTTCGGGCT

MITE700\_04 CCGTAGAGCCCGGCGGGTACGCTACAGCGTAGCTCGAAGGGCCGTAGAGCCGAGCTCGGTACGCTCTACGGCGTAGCCGAGTCCGTTAGGGCTAGCTCGACCCCTTTCGGGCT

MITE700\_12 CCGTAGAGCCCGGCGGGTACGCTACAGCGTAGCTCGAAGGGCCGTAGAGCCGAGCTCGGTACGCTCTACGGCGTAGCCGAGTCCGTTAGGGCTAGCTCGACCCCTTTCGGGCT

MITE700\_13 CCGTAGAGCCCGGCGGGTACGCTACAGCGTAGCTCGAAGGGCCGTAGAGCCGAGCTCGGTACGCTCTACGGCGTAGCCGAGTCCGTTAGGGCTAGCTCGACCCCTTTCGGGCT

MITE700\_14 -----

MITE700\_08 -----

MITE700\_07 -----

MITE700\_03 -----TACAGCGTAACTCGAAGAGCTGTAGAGCTAGCTCGACC-----

MITE700\_11 CCGTAGAGCTTGGCGAGTACGAGCTACAGCGTAGCTCGAAGGGCCGTAGAGCCGAGCTCGGTACGCTCTACGGCGTAGCCGAGTCCGTTAGGGCTAGCTCGACCCCTTTCGGGCT

MITE700\_06 CCGTAGAGCCCGGCGGGTACGCTACAGCGTAGCTCGAAGGGCCGTAGAGCCGAGCTCGGTACGCTCTACGGCGTAGCCGAGTCCGTTAGGGCTAGCTCGACCCCTTTCGGGCT

481 \* \* \* \* \* 600

MITE700\_01 ATGTTCCGACGGCTATAAAACAATGCGGATTCGATCC--AAGAAAAATGCAATATGCTGTTTGTCAATGTATTCATTTGCTGTTTGGAGGTTTCAGCTTCGAGGGCTCCGACGTC

MITE700\_05 ATGTTCCGACGGCTATAAAACAATGCGGATTCGATCC--AAGAAAAATGCAATATGCTGTTTGTCAATGTATTCATTTGCTGAGGATTCAGCTTCGAGGGCTTCGACATC

MITE700\_09 ATGTTCCGATGGCTATAAAACAATGCGGATTCGATCC--AAGAAAAATGCAATATGCTGTTTGTCAATGTATTCATTTGCTGAGGATTCAGCTTCGAGGGCTTCGACATC

MITE700\_02 ATGTTCCGAAAGGCTATAAAACAATGCGGATTCGATCC--AAGAAAAATGCAATATGCTGTTTGTCAATGTATTCATTTGCTGAGGATTCAGCTTCGAGGGCTTCGACATC

MITE700\_10 ATGTTCCGAAAGGCTATAAAACAATGCGGATTCGATCC--AAGAAAAATGCAATATGCTGTTTGTCAATGTATTCATTTGCTGAGGATTCAGCTTCGAGGGCTTCGACATC

MITE700\_04 ATATTCCGAAAGGCTATAAAACAATGCGGATTCGATCC--AAGAAAAATGCAATATGCTGTTTGTCAATGTATTCATTTGCTGAGGATTCAGCTTCGAGGGCTTCGACATC

MITE700\_12 ATGTTCCGAAAGGCTATAAAACAATGCGGATTCGATCC--AAGAAAAATGCAATATGCTGTTTGTCAATGTATTCATTTGCTGAGGATTCAGCTTCGAGGGCTTCGACATC

MITE700\_13 ATGTTCCGAAAGGCTATAAAACAATGCGGATTCGATCC--AAGAAAAATGCAATATGCTGTTTGTCAATGTATTCATTTGCTGAGGATTCAGCTTCGAGGGCTTCGACATC

MITE700\_14 -----

MITE700\_08 -----

MITE700\_07 -----

MITE700\_03 -----TATGCTGTTTGTCAAGCTATTTCAATTTCTCGGTTAGAGGTTTCAGCTTCGAAAGCTTCGACATC

MITE700\_11 ATATTCCGAAAGGCTATAAAACAATGCG-----

MITE700\_06 -----

IR 12 bp

601 \* \* \* \* \* 720

MITE700\_01 CAATGAGAGCTCAAACTTTTCCCTTTCAATTTCTGATTCGGTATAGTCAATATCCCATCAAGAGTTTGATCGATAAGGCGGATCTTATGAGGATCGACACCATATCGCTTACATCGAACTCAGCT

MITE700\_05 CAATGAGAGCTCAAACTTTTCCCTTTCAATTTCTGATTCGGTATAGTCAATATCCCATCAAGAGTTTGATCGATAAGGCGGATCTTATGAGGATCGACACCATATCGCTTACATCGAACTCAGCT

MITE700\_09 CAATGAGAGCTCAAACTTTTCCCTTTCAATTTCTGATTCGGTATAGTCAATATCCCATCAAGAGTTTGATCGATAAGGCGGATCTTATGAGGATCGACACCATATCGCTTACATCGAACTCAGCT

MITE700\_02 CAATGAGAGCTCAAACTTTTCCCTTTCAATTTCTGATTCGGTATAGTCAATATCCCATCAAGAGTTTGATCGATAAGGCGGATCTTATGAGGATCGACACCATATCGCTTACATCGAACTCAGCT

MITE700\_10 CAATGAGAGCTCAAA-----

MITE700\_04 CGATGAGAGCTCAAAATTTTTCCCTTTCAATTTCTGATTCGGTATAGTCAATATCCCATCAAGAGTTTGATCGATAAGGCGGATCTTATGAGGATCGACACCATATCGCTTACATCGAACTCAGCT

MITE700\_12 CGATGAGAGCTCAAAATTTTTCCCTTTCAATTTCTGATTCGGTATAGTCAATATCCCATCAAGAGTTTGATCGATAAGGCGGATCTTATGAGGATCGACACCATATCGCTTACATCGAACTCAGCT

MITE700\_13 CGATGAGAGCTCAAACTTTTCCCTTTCAATTTCTGATTCGGTATAGTCAATATCCCATCAAGAGTTTGATCGATAAGGCGGATCTTATGAGGATCGACACCATATCGCTTACATCGAACTCAGCT

MITE700\_14 -----CAAACTTTTCCCTTTCAATTTCCAAATTCGGTATAGTCAATATCCCATCAAGAGTTTGATCGATAAGGCGGATCTTATGAGGATCGACACCATATCGCTTACATCGAACTCAGCT

MITE700\_08 -----CAAACTTTTCCCTTTCAATTTCCAAATTCGGTATAGTCAATATCCCATCAAGAGTTTGATCGATAAGGCGGATCTTATGAGGATCGACACCATATCGCTTACATCGAACTCAGCT

MITE700\_07 CGATGAGAGCTCAAACTTTTCCCTTTCAATTTCTGATTCGGTATAGTCAATATCCCATCAAGAGTTTGATCGATAAGGCGGATCTTATGAGGATCGACACCATATCGCTTACATCGAACTCAGCT

MITE700\_03 CGATGAGAGCTCAAACTTTTCCCTTTCAATTTCTGATTCGGTATAGTCAATATCCCATCAAGAGTTTGATCGATAAGGCGGATCTTATGAGGATCGACACCATATCGCTTACATCGAACTCAGCT

MITE700\_11 -----

MITE700\_06 -----

supplementary Figure 2

|             | IR                                                                                                                               | Repeat A         |     |
|-------------|----------------------------------------------------------------------------------------------------------------------------------|------------------|-----|
|             | 1                                                                                                                                |                  | 120 |
| MITEPgRS_04 | GAGACTGTTGCGGGGAGTTTCATTGAGCTCTTTGCTGCAGAGCTGATTCTTAGTGTCTTCGGGAAAGGTCAAACCTCCGGTATATGGGCAC--CGAGCAAATAGAAATTT-CACCAAGT          |                  |     |
| MITEPgRS_07 | GAGACTGTTGCGGGGAGTTTCATTGAGCTCTTTGCTGCAGAGCAGATTCTTAGTGTCTTCGGGAAAGGTCAAACCTCCGGTATATGGACACAGCAAGCAAACAGAAATTT-CATCAAGT          |                  |     |
| MITEPgRS_16 | AAGACTGTTGCGGGGAGTTTCATTGAGCTCTTTGCTGCAGAGCTGATTCTTAGTGTCTTCGGGAAAGGTCAAACCTCCGGTATATGGGCAC--CGAGCAAATAGAAATTT-CACCAAGT          |                  |     |
| MITEPgRS_13 | -GAAGTGTGCGGGGAGTTTCATTGAGCTCTTTGCTGCAGAGCTGATTCTTAGTGTCTTCGGGAAAGGTCAAACCTCCGGTATATGGACAT--CGAGCAAACAGAAATTT-CCCCAAGT           |                  |     |
| MITEPgRS_18 | GAGACTGTTGCGGGGAGTTTCATTGAACTCTTTGCTGCAGAGCTGATTCTTAGTGTCTTCGGGAAAGGTCAAACCTCCGGTATATGGACAT--CGAGCAAACAGAAATTT-CCCCAAGT          |                  |     |
| MITEPgRS_14 | GAGACTGTTGCGGGGAGTTTCATTGAGCTCTTTGCTGCAGAGCAGATTCTTAGTGTCTTCGGGAAAGGTCAAACCTCCGGTATATGGGCAC--CGAGCAAATAGAAATTT-CACCAAGT          |                  |     |
| MITEPgRS_12 | GAGACTGTTGCGGGGAGTTTCATTGAGCTCTTTGCTGCAGAGCTGATTCTTAGTGTCTTCGGGAAAGGTCAAACCTCCGGTATATGGGCAC--CGAGCAAATAGAAATTT-CCCCAAGT          |                  |     |
| MITEPgRS_01 | GAGATTGTTGCGGGGAGTTTCATTGAGTTCTTTGCTGCAGAGCTGATTCTTAGTGTCTTCGGGAAAGGTCAAACCTCCGGTATATGGGCAC--CGAGCAAATAGAAATTT-CCCCAAGT          |                  |     |
| MITEPgRS_11 | GAGACTGTTGCGGGGAGTTTCATTGAACTCTTTGCTGCAGAGCAGATTCTTAGTGTCTTCGGGAAAGGTCAAACCTCCGGTATATGGGCAC--CGAGCAAATAGAAATTT-CCCCAAGT          |                  |     |
| MITEPgRS_02 | GAGACTGTTGCGGGGAGTTTCATTGAGCTCTTTGCTGCAGAGCAGATTCTTAGTGTCTTCGGGAAAGGTCAAACCTCCGGTATATGGGCAC--CGAGCAAATAGAAATTT-CCCCAAGT          |                  |     |
| MITEPgRS_06 | GAGACTGTTGCGGGGAGTTTCATTGAACTCTTTGCTGCAGAGCTGATTCTTAGTGTCTTCGGGAAAGGTCAAACCTC-AAGATATGGCTAC--CAAGCAAACAGAAATTT-CCCCAAGT          |                  |     |
| MITEPgRS_08 | GAGACTGTTGCGGGGAGTTTCATTGAACTCTTTGCTGCAGAGCTGATTCTTAGTGTCTTCGGGAAAGGTCAAACCTCCAGGACATGAGCAC--CGAGCAAATAGATATTTTCCCCCAGT          |                  |     |
| MITEPgRS_19 | -----                                                                                                                            |                  |     |
| MITEPgRS_10 | -----                                                                                                                            |                  |     |
| MITEPgRS_03 | -----                                                                                                                            |                  |     |
| MITEPgRS_05 | -----                                                                                                                            |                  |     |
| MITEPgRS_09 | -----                                                                                                                            |                  |     |
| MITEPgRS_15 | -----                                                                                                                            |                  |     |
| MITEPgRS_17 | -----                                                                                                                            |                  |     |
| MITEPgRS_20 | -----                                                                                                                            |                  |     |
|             |                                                                                                                                  | Repeat B         |     |
|             | 121                                                                                                                              |                  | 220 |
| MITEPgRS_04 | TTCCATCAGA-----GAAGTATTCCTTTCTCGTCAAATCAATGCTTGTGCCGATAGGCGAGAAATAAGGAA                                                          |                  |     |
| MITEPgRS_07 | TTCCATTAGA-----GAAGTACTCCTTTCTCGTCAAATCAATGCTTGTGCCGATAGGCGAGAAATAAGGAA                                                          |                  |     |
| MITEPgRS_16 | TTCCATCAGA-----GAAGTACTCCTTTCTCGTCAAAT-----AAGTGAGAAATAAGGAA                                                                     |                  |     |
| MITEPgRS_13 | TTC-TTTCAGAGGTGGATACTTGAGGTTGCGCAGAGACTCAGATGAAGCACTCCTTTTTCGTCAAATCAATGCTTGTGCCGATAGGTTGAGAAACAAGAAA                            |                  |     |
| MITEPgRS_18 | TTCCATTAGA-----GAAGTACTCCTTTCTCGTCAAAT-----AGGCGAGAAATAAGAAA                                                                     |                  |     |
| MITEPgRS_14 | TTCCATTAGA-----GAAGTACTCCTTTCTCGTCAAAT-----AGGCGAGAAATAAGAAA                                                                     |                  |     |
| MITEPgRS_12 | TTCCATTAGA-----GAAGTACTCCTTTCTCGTCAAAT-----AGGCGAGAAATAAGAAA                                                                     |                  |     |
| MITEPgRS_01 | TTCCATTAGA-----GAAGTACTCCTTTCTCGTCAAAT-----AGGCGAGAAATAAGAAA                                                                     |                  |     |
| MITEPgRS_11 | TTCCATTAGA-----GAAGTACTCCTTTCTCGTCAAAT-----AGGCGAGAAATAAGAAA                                                                     |                  |     |
| MITEPgRS_02 | TTCCATTAGA-----GAAGTACTCCTTTCTCGTCAAAT-----AGGCGAGAAATAAGAAA                                                                     |                  |     |
| MITEPgRS_06 | TTCCATCAGA-----                                                                                                                  |                  |     |
| MITEPgRS_08 | TTC-TTTCATAGGTGTATACTTGAGGTTGCGCAGAGATCCGATGAAGCATTCTTTCTCGTCAAATCAATGCTTGTGTCGATAGGCGAGAAAT-----                                |                  |     |
| MITEPgRS_19 | -----                                                                                                                            |                  |     |
| MITEPgRS_10 | -----                                                                                                                            |                  |     |
| MITEPgRS_03 | -----                                                                                                                            |                  |     |
| MITEPgRS_05 | -----                                                                                                                            |                  |     |
| MITEPgRS_09 | -----                                                                                                                            |                  |     |
| MITEPgRS_15 | -----                                                                                                                            |                  |     |
| MITEPgRS_17 | -----                                                                                                                            |                  |     |
| MITEPgRS_20 | -----                                                                                                                            |                  |     |
|             |                                                                                                                                  | Repeat C regions |     |
|             | 221                                                                                                                              |                  | 344 |
| MITEPgRS_04 | TGATTGTCAGCTGTTTCTTGCTTCCCTGCACGATGCAGGACG-CGATTGTCAGCTGATTCTTGCTTCCCTGCACGATGCAGGACG-TGATTGTCAGCTGATTCTTGCTTCCCTGCACGATGCAGGACG |                  |     |
| MITEPgRS_07 | TGATTGTCAGCTGTTTCTTGCTTCCCTGCACGATGCAGGACG-CGATTGTCAGCTGATTCTTGCTTCCCTGCACGATGCAGGACG-CGATTGTCAGCTGATTCTTGCTTCCCTGCACGATGCAGGACG |                  |     |
| MITEPgRS_16 | TGATTGTCAGCTGTTTCTTGCTTCCCTGCACGATGCAGGACG-CGATTGTCAGCTGATTCTTGCTTCCCTGCACGATGCAGGACG-CGATTGTCAGCTGATTCTTGCTTCCCTGCACGATGCAGGACG |                  |     |
| MITEPgRS_13 | TGATTGTCAGCTGTTTCTTGCTTCCCTGCACGATGCAGGACG-CGATTGTCAGCTGATTCTTGCTTCCCTGCACGATGCAGGACG-CGATTGTCAGCTGATTCTTGCTTCCCTGCACGATGCAGGACG |                  |     |
| MITEPgRS_18 | CGATTGTCAGCTGTTTCTTGCTTCCCTGCACGATGCAGGACG-CGATTGTCAGCTGATTCTTGCTTCCCTGCACGATGCAGGACG-CGATTGTCAGCTGATTCTTGCTTCCCTGCACGATGCAGGACG |                  |     |
| MITEPgRS_14 | CGATTGTCAGCTGTTTCTTGCTTCCCTGCACGATGCAGGACG-CGATTGTCAGCTGATTCTTGCTTCCCTGCACGATGCAGGACG-CGATTGTCAGCTGATTCTTGCTTCCCTGCACGATGCAGGACG |                  |     |
| MITEPgRS_12 | CGATTGTCAGCTGTTTCTTGCTTCCCTGCACGATGCAGGACG-TGATTGTCAGCTGATTCTTGCTTCCCTGCACGATGCAGGACG-CGATTGTCAGCTGATTCTTGCTTCCCTGCACGATGCAGGACG |                  |     |
| MITEPgRS_01 | CGATTGTCAGCTGTTTCTTGCTTCCCTGCACGATGCAGGACG-CGATTGTCAGCTGATTCTTGCTTCCCTGCACGATGCAGGACG-----                                       |                  |     |
| MITEPgRS_11 | CGATTGTCAGCTGTTTCTTGCTTCCCTGCACGATGCAGGACG-----                                                                                  |                  |     |
| MITEPgRS_02 | CGATTGTCAGCTGTTTCTTGCTTCCCTGCACGATGCAGGACG-CGATTGTCAGCTGATTCTTGCTTCCCTGCACGATGCAGGACG-CGATTGTCAGCTGATTCTTGCTTCCCTGCACGATGCAGGACG |                  |     |
| MITEPgRS_06 | -----                                                                                                                            |                  |     |
| MITEPgRS_08 | -----                                                                                                                            |                  |     |
| MITEPgRS_19 | -----                                                                                                                            |                  |     |
| MITEPgRS_10 | -----                                                                                                                            |                  |     |
| MITEPgRS_03 | -----                                                                                                                            |                  |     |
| MITEPgRS_05 | -----                                                                                                                            |                  |     |
| MITEPgRS_09 | -----                                                                                                                            |                  |     |
| MITEPgRS_15 | -----                                                                                                                            |                  |     |
| MITEPgRS_17 | -----                                                                                                                            |                  |     |
| MITEPgRS_20 | -----                                                                                                                            |                  |     |
|             | 345                                                                                                                              |                  | 467 |
| MITEPgRS_04 | CGATTGTCAGCTGATTCTTGCTTCCCTGCACGATGCAGGACG-CGATTGTCAGCTGATTCTTGCTTCCCTGCACGATGCAGGACG-CGATTGTCAGCTGATTCTTGCTTCCCTGCACGATGCAGGACG |                  |     |
| MITEPgRS_07 | TGATTGTCAGCTGATTCTTGCTTCCCTGCACGATGCAGGACG-CGATTGTCAGCTGATTCTTGCTTCCCTGCACGATGCAGGACG-CGATTGTCAGCTGATTCTTGCTTCCCTGCACGATGCAGGACG |                  |     |
| MITEPgRS_16 | CGATTGTCAGCTGATTCTTGCTTCCCTGCACGATGCAGGACG-CGATTGTCAGCTGATTCTTGCTTCCCTGCACGATGCAGGACG-CGATTGTCAGCTGATTCTTGCTTCCCTGCACGATGCAGGACG |                  |     |
| MITEPgRS_13 | CGATTGTCAGCTGATTCTTGCTTCCCTGCACGATGCAGGACG-CGATTGTCAGCTGATTCTTGCTTCCCTGCACGATGCAGGACG-TGATTGTCAGCTGATTCTTGCTTCCCTGCACGATGCAGGACG |                  |     |
| MITEPgRS_18 | CGATTGTCAGCTGATTCTTGCTTCCCTGCACGATGCAGGACG-CGATTGTCAGCTGATTCTTGCTTCCCTGCACGATGCAGGACG-CGATTGTCAGCTGATTCTTGCTTCCCTGCACGATGCAGGACG |                  |     |
| MITEPgRS_14 | CGATTGTCAGCTGATTCTTGCTTCCCTGCACGATGCAGGACG-CGATTGTCAGCTGATTCTTGCTTCCCTGCACGATGCAGGACG-CGATTGTCAGCTGATTCTTGCTTCCCTGCACGATGCAGGACG |                  |     |
| MITEPgRS_12 | CGATTGTCAGCTGATTCTTGCTTCCCTGCACGATGCAGGACG-CGATTGTCAGCTGATTCTTGCTTCCCTGCACGATGCAGGACG-CGATTGTCAGCTGATTCTTGCTTCCCTGCACGATGCAGGACG |                  |     |
| MITEPgRS_01 | -----                                                                                                                            |                  |     |
| MITEPgRS_11 | -----                                                                                                                            |                  |     |
| MITEPgRS_02 | CGATTGTCAGCTGATTCTTGCTTCCCTGCACGATGCAGGACG-CGATTGTCAGCTGATTCTTGCTTCCCTGCACGATGCAGGACG-----                                       |                  |     |
| MITEPgRS_06 | -----                                                                                                                            |                  |     |
| MITEPgRS_08 | -----                                                                                                                            |                  |     |
| MITEPgRS_19 | -----                                                                                                                            |                  |     |
| MITEPgRS_10 | -----                                                                                                                            |                  |     |
| MITEPgRS_03 | -----                                                                                                                            |                  |     |
| MITEPgRS_05 | -----                                                                                                                            |                  |     |
| MITEPgRS_09 | -----                                                                                                                            |                  |     |
| MITEPgRS_15 | -----                                                                                                                            |                  |     |
| MITEPgRS_17 | -----                                                                                                                            |                  |     |
| MITEPgRS_20 | -----                                                                                                                            |                  |     |



supplementary Figure 2 (continue)

Repeat B

942 1061

MITEPgRS\_04 -----TACTTGAGGTTTGCAGAGAGATCGCATGAAGCTCT-CCTTTCTTCGTCAAATCAATGCTTGTGTCTGTCTTGATCGA

MITEPgRS\_07 -----TACTTGAGGTTTGCAGAGAGATCGCATGAAGCTCT-CCTTTCTTCGTCAAATCAATGCTTGTGTCTGTCTTGATCGA

MITEPgRS\_16 -----

MITEPgRS\_13 -----TACTTGAGGTTTGCAGAGAGATCGCATGAAGCTCT-CCTTTCTTCGTCAAATCAATGCTTGTGTCTGTCTTGATCAA

MITEPgRS\_18 ACCAAACAAATAGAAAT-----TACTTGAGGTTTGCAGAGAGATCGCATGAAGCTCT-CCTTTCTTCGTCAAATCAATGCTTGTGTCTGTCTTGATCGA

MITEPgRS\_14 -----TACTTGAGGTTTGCAGAGAGATCGCATGAAGCTCT-CCTTTCTTCGTCAAATCAATGCTTGTGTCTGTCTTGATCGA

MITEPgRS\_12 ACCAAGCAAACAGAAATTTCCCAAGTTTCCATCAGAGGTA--TACTTGAGCTTTGAAGAGA--TTGCATGAAATACTTCCTTTCTTCGTCAAATCAATGCTTGTGTCTGTCTTGATCGA

MITEPgRS\_01 -----TACTTGAGGTTTGCAGAGAGATCGCATGAAGCTCT-CCTTTCTTCGTCAAATCAATGCTTGTGTCTGTCTTGATCGA

MITEPgRS\_11 ACCAAACAAATAGAAAT-----TACTTGAGGTTTGCAGAGAGATCGCATGAAGCTCT-CCTTTCTTCGTCAAATCAATGCTTGTGTCTGTCTTGATCGA

MITEPgRS\_02 -----TACTTGAGGTTTGCAGAGAGATCGCATGAAGCTCT-CCTTTCTTCGTCAAATCAATGCTTGTGTCTGTCTTGATCGA

MITEPgRS\_06 -----GGTA--TACTTGAGCTTTGAAGAGA--TTGCATGAAATACTTCCTTTCTTCGTCAAATCAATGCTTGTGTCTGTCTTGATCGA

MITEPgRS\_08 -----CCCCGGATTGGGAGATGAGCTTTTCGAATTTGGGTCCGGGGGAAGTCAAGTCCAATAGGAAAAGCAGACGAAGAGAAGCCAAACTCATCCTGTCTTGATCAA

MITEPgRS\_19 -----TACTTGAGGTTTGCAGAGAGATCGCATGAAGCTCT-CCTTTCTTCGTCAAATCAATGCTTGTGTCTGTCTTGATCGA

MITEPgRS\_10 -----TACTTGAGGTTTGCAGAGAGATCGCATGAAGCTCT-CCTTTCTTCGTCAAATCAATGCTTGTGTCTGTCTTGATCGA

MITEPgRS\_03 ACCAAGCAAACAGAAATTTCCCAAGCTTCCATCAGAGGTATATACTTGAGGTTTGCAGAGA--CTGCATGAAGCACT-CCTTTCTTCGTCAAATCAATGCTTGTGTCTGTCTTGATCAA

MITEPgRS\_05 -----TTCCCAAGTTTCCA-----TACTTGAGGTTTCGCAAGA--CTGCATGAAGCACT-CCTTTCTTCGTCAAATCAATGCTTGTGTCTGTCTTGATCAA

MITEPgRS\_09 -----TTGAGGTTTCGAGAGA-CCTACATGAGGCTCT-CCTTTCTTCGTCAAATCAATGCTTGTGTCTGTCTTGATCAA

MITEPgRS\_15 -----TA-TTGAGGTTTGCAGAGA-CTGCATGAAGTACTA-CPTT-CTTCGTCAAATCAATGCTTGTGTCTGTCTTGATCAA

MITEPgRS\_17 -----TGCATAGAGTACT-CCTTTCTTCGTCAAATCAATGCTTGTGTCTGTCTTGATCAA

MITEPgRS\_20 -----TATACTTGGGGTTTCGAGAGA-TCCACATGAAGTCT-CCTTTCTTCGTCAAATCAATGCTTGTGTCTTGATCAA-----

IR

1062 1097

MITEPgRS\_04 TATGAGAGGGGG--GGGTTATTGTGCAACAGTCTC

MITEPgRS\_07 TATGAGAGGGGG---AGGTTATTGTGCAAAAGTCTC

MITEPgRS\_16 -----

MITEPgRS\_13 TATGAGAGGGG----GGGTTATTGTGCAACGGTCTC

MITEPgRS\_18 TATGAGAGGGTGGG-AGGTTATTGTGCAACAGTCTC

MITEPgRS\_14 TATGAGAGGGGTGGAAGGGTTTGTGCAACGGTCTC

MITEPgRS\_12 TATGAGAGGGTGG-AAGGTTATTGTGCAACAGTCTC

MITEPgRS\_01 TATGAGAGGGGGG-AGGTTATTGTGCAACGGTCTC

MITEPgRS\_11 TATGAGAGGGGGG-AAGGTTATTGTGCAACGGTCTC

MITEPgRS\_02 TATGAGAGGGGGG-AGGTTATTGTGCAACGGTCTC

MITEPgRS\_06 TATAAGGAGGTGGG-AGGTTATTGTGCAACAGTCTC

MITEPgRS\_08 TATGATGGGGTGAAGGGTTATTGTGCAACGGCTC

MITEPgRS\_19 TATGAGAGAGGGGGAGGTTATTGTGCAACAGTCTC

MITEPgRS\_10 TATGAGAGAGGGGGAGGTTATTGTGCAACAGTCTC

MITEPgRS\_03 TATGAGAGGGGTAGGAGGGTTATTGTGCAATGGTCTC

MITEPgRS\_05 TATGAAAGGATAGAAGGTTATTGTGCAATGGTCTC

MITEPgRS\_09 TATGAG---GGGGAGGGTTATTGTGCAAAAGTCTC

MITEPgRS\_15 TATGAGGGGATGAAGGGTTATTGTGCAATGGTCTT

MITEPgRS\_17 -----

MITEPgRS\_20 -----

Supplementary Figure 3

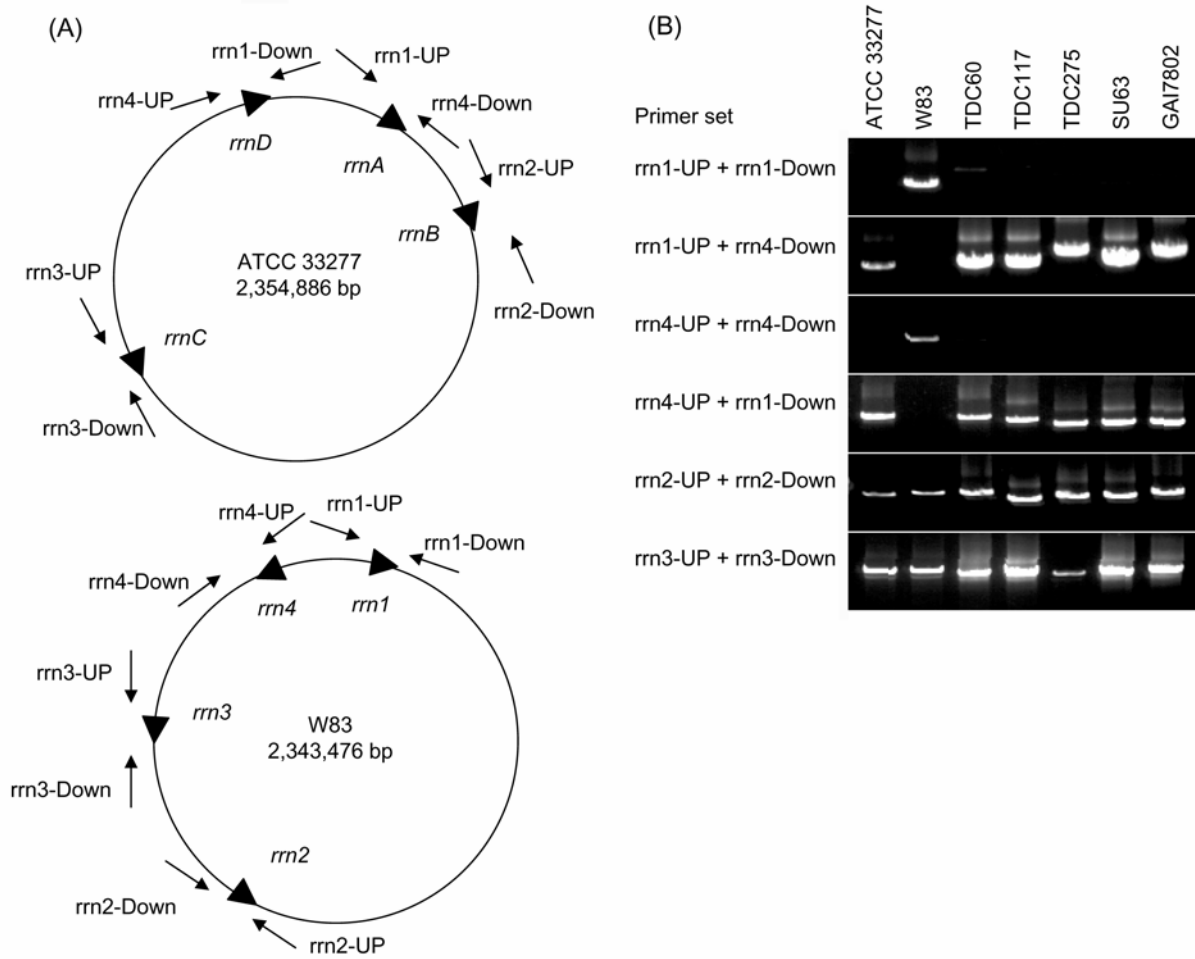

Supplementary Figure 4

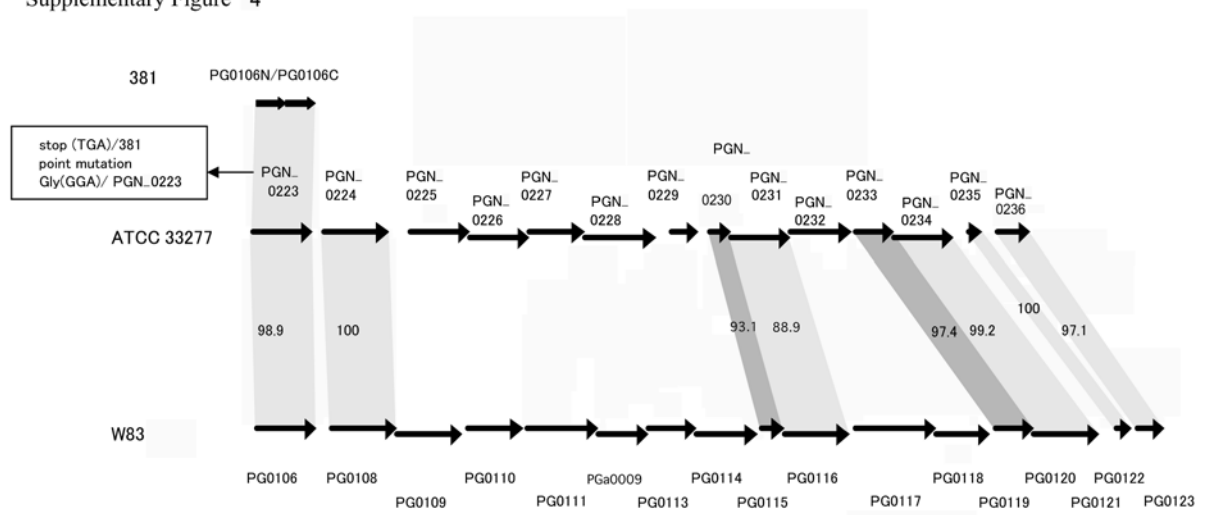



# Supplementary Figure 5 A

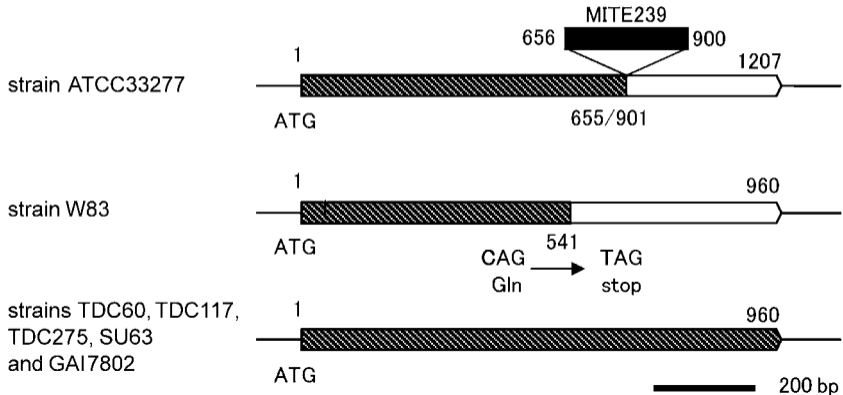

# Supplementary Figure 5B

PGN\_0379

-202 1 -83  
33277 TTATTTTCATCGATGTATTGGCCGGTCTGGTTTCGGGACTCTTATTCTATTACGGAGGAAACAACTGTATTCTGGTGGTGGATATCGTTCATCAGTGGCCGGGAGGAGCAAACCTGCAAAGCAT  
GAI 7802 TTATTTTCATCGATGTATTGGCCGGTCTGGTTTCGGGACTCTTATTCTATTACGGAGGAAACAACTGTATTCTGGTGGTGGATATCGTTCATCAGTGGTGGCCGGGAGGAGCAAACCTGCAAAGCAT  
TDC60 TTATTTTCATCGATGTATTGGCCGGTCTGGTTTCGGGACTCTTATTCTATTACGGAGGAAACAACTGTATTCTGGTGGTGGATATCGTTCATCAGTGGTGGCCGGGAGGAGCAAACCTGCAAAGCAT  
W83 TTATTTTCATCGATGTATTGGCCGGTCTGGTTTCGGGACTCTTATTCTATTACGGAGGAAACAACTGTATTCTGGTGGTGGATATCGTTCATCAGTGGCCGGGAGGAGCAAACCTGCAAAGCAT  
SUE3 TTATTTTCATCGATGTATTGGCCGGTCTGGTTTCGGGACTCTTATTCTATTACGGAGGAAACAACTGTATTCTGGTGGTGGATATCGTTCATCAGTGGTGGCCGGGAGGAGCAAACCTGCAAAGCAT  
TDC275 TTATTTTCATCGATGTATTGGCCGGTCTGGTTTCGGGACTCTTATTCTATTACGGAGGAAACAACTGTATTCTGGTGGTGGATATCGTTCATCAGTGGTGGCCGGGAGGAGCAAACCTGCAAAGCAT  
TDC117 TTATTTTCATCGATGTATTGGCCGGTCTGGTTTCGGGACTCTTATTCTATTACGGAGGAAACAACTGTATTCTGGTGGTGGATATCGTTCATCAGTGGTGGCCGGGAGGAGCAAACCTGCAAAGCAT  
\*\*\*\*\*

-82 1 34  
33277 ACCCGCCGGCCGGTGAACGAA----CGAAAAAACGAATATCTTTGGCGGATATAGCTAAAGTGAATATCTAAAAGACACTATTTCAAATGAAAAAGCCCTTATGTATTAGGAGTGGATGTAG  
GAI 7802 ACCCGCCGGCCGGTGAACGAA----CGAAAAAACGAATATCTTTGGCGGATATAGCTAAAGTGAATATCTAAAAGACACTATTTCAAATGAAAAAGCCCTTATGTATTAGGAGTGGATGTAG  
TDC60 ACCCGCCGGCCGGTGAACGAA----CGAAAAAACGAATATCTTTGGCGGATATAGCTAAAGTGAATATCTAAAAGACACTATTTCAAATGAAAAAGCCCTTATGTATTAGGAGTGGATGTAG  
W83 ACCCGCCGGCCGGTGAACGAA----CGAAAAAACGAATATCTTTGGCGGATATAGCTAAAGTGAATATCTAAAAGACACTATTTCAAATGAAAAAGCCCTTATGTATTAGGAGTGGATGTAG  
SUE3 ACCCGCCGGCCGGTGAACGAA----CGAAAAAACGAATATCTTTGGCGGATATAGCTAAAGTGAATATCTAAAAGACACTATTTCAAATGAAAAAGCCCTTATGTATTAGGAGTGGATGTAG  
TDC275 ACCCGCCGGCCGGTGAACGAA----CGAAAAAACGAATATCTTTGGCGGATATAGCTAAAGTGAATATCTAAAAGACACTATTTCAAATGAAAAAGCCCTTATGTATTAGGAGTGGATGTAG  
TDC117 ACCCGCCGGCCGGTGAACGAA----CGAAAAAACGAATATCTTTGGCGGATATAGCTAAAGTGAATATCTAAAAGACACTATTTCAAATGAAAAAGCCCTTATGTATTAGGAGTGGATGTAG  
\*\*\*\*\*

35 154  
33277 GCGGTACCAACACCGTATTTCGGAGTGTGGACGCTCGTGGCAATTTGGTTATAAGTTCGTCCATCAAGACCGGAGCGCACACAGTCTGAACGATTTATATCAAAGATCTGACTGCCGGCA  
GAI 7802 GCGGTACCAACACCGTATTTCGGAGTGTGGACGCTCGTGGCAATTTGGTTATAAGTTCGTCCATCAAGACCGGAGCGCACACAGTCTGAACGATTTATATCAAAGATCTGACTGCCGGCA  
TDC60 GCGGTACCAACACCGTATTTCGGAGTGTGGACGCTCGTGGCAATTTGGTTATAAGTTCGTCCATCAAGACCGGAGCGCACACAGTCTGAACGATTTATATCAAAGATCTGACTGCCGGCA  
W83 GCGGTACCAACACCGTATTTCGGAGTGTGGACGCTCGTGGCAATTTGGTTATAAGTTCGTCCATCAAGACCGGAGCGCACACAGTCTGAACGATTTATATCAAAGATCTGACTGCCGGCA  
SUE3 GCGGTACCAACACCGTATTTCGGAGTGTGGACGCTCGTGGCAATTTGGTTATAAGTTCGTCCATCAAGACCGGAGCGCACACAGTCTGAACGATTTATATCAAAGATCTGACTGCCGGCA  
TDC275 GCGGTACCAACACCGTATTTCGGAGTGTGGACGCTCGTGGCAATTTGGTTATAAGTTCGTCCATCAAGACCGGAGCGCACACAGTCTGAACGATTTATATCAAAGATCTGACTGCCGGCA  
TDC117 GCGGTACCAACACCGTATTTCGGAGTGTGGACGCTCGTGGCAATTTGGTTATAAGTTCGTCCATCAAGACCGGAGCGCACACAGTCTGAACGATTTATATCAAAGATCTGACTGCCGGCA  
\*\*\*\*\*

155 274  
33277 TCAATCAGTGTATCGAAAGCTAGGAGGGAAAGAGAAGATAAAGGGTATCGGTGTAGGTGCTCCCAATGGAACATATTATACCGGATCGATCGAGTTTGGCCCAATTTGCCCTTGGAAAC  
GAI 7802 TCAATCAGTGTATCGAAAGCTAGGAGGGAAAGAGAAGATAAAGGGTATCGGTGTAGGTGCTCCCAATGGAACATATTATACCGGATCGATCGAGTTTGGCCCAATTTGCCCTTGGAAAC  
TDC60 TCAATCAGTGTATCGAAAGCTAGGAGGGAAAGAGAAGATAAAGGGTATCGGTGTAGGTGCTCCCAATGGAACATATTATACCGGATCGATCGAGTTTGGCCCAATTTGCCCTTGGAAAC  
W83 TCAATCAGTGTATCGAAAGCTAGGAGGGAAAGAGAAGATAAAGGGTATCGGTGTAGGTGCTCCCAATGGAACATATTATACCGGATCGATCGAGTTTGGCCCAATTTGCCCTTGGAAAC  
SUE3 TCAATCAGTGTATCGAAAGCTAGGAGGGAAAGAGAAGATAAAGGGTATCGGTGTAGGTGCTCCCAATGGAACATATTATACCGGATCGATCGAGTTTGGCCCAATTTGCCCTTGGAAAC  
TDC275 TCAATCAGTGTATCGAAAGCTAGGAGGGAAAGAGAAGATAAAGGGTATCGGTGTAGGTGCTCCCAATGGAACATATTATACCGGATCGATCGAGTTTGGCCCAATTTGCCCTTGGAAAC  
TDC117 TCAATCAGTGTATCGAAAGCTAGGAGGGAAAGAGAAGATAAAGGGTATCGGTGTAGGTGCTCCCAATGGAACATATTATACCGGATCGATCGAGTTTGGCCCAATTTGCCCTTGGAAAC  
\*\*\*\*\*

275 394  
33277 AGACCAAAATACCCCTTCGCCCAAATGCTCACCGATTCAATAGGTATCCCCAGCACCTGACCAATGATGCCAATGCTGTGCCATCGGAGAGATGACCTATGGAGCAGCTCGTGGCATGA  
GAI 7802 AGACCAAAATACCCCTTCGCCCAAATGCTCACCGATTCAATAGGTATCCCCAGCACCTGACCAATGATGCCAATGCTGTGCCATCGGAGAGATGACCTATGGAGCAGCTCGTGGCATGA  
TDC60 AGACCAAAATACCCCTTCGCCCAAATGCTCACCGATTCAATAGGTATCCCCAGCACCTGACCAATGATGCCAATGCTGTGCCATCGGAGAGATGACCTATGGAGCAGCTCGTGGCATGA  
W83 AGACCAAAATACCCCTTCGCCCAAATGCTCACCGATTCAATAGGTATCCCCAGCACCTGACCAATGATGCCAATGCTGTGCCATCGGAGAGATGACCTATGGAGCAGCTCGTGGCATGA  
SUE3 AGACCAAAATACCCCTTCGCCCAAATGCTCACCGATTCAATAGGTATCCCCAGCACCTGACCAATGATGCCAATGCTGTGCCATCGGAGAGATGACCTATGGAGCAGCTCGTGGCATGA  
TDC275 AGACCAAAATACCCCTTCGCCCAAATGCTCACCGATTCAATAGGTATCCCCAGCACCTGACCAATGATGCCAATGCTGTGCCATCGGAGAGATGACCTATGGAGCAGCTCGTGGCATGA  
TDC117 AGACCAAAATACCCCTTCGCCCAAATGCTCACCGATTCAATAGGTATCCCCAGCACCTGACCAATGATGCCAATGCTGTGCCATCGGAGAGATGACCTATGGAGCAGCTCGTGGCATGA  
\*\*\*\*\*

395 514  
33277 AGGACTTCATCGTTATCACGCTCGTACGGGGTTCGGAAGCGGCATAGTAGTCAATGGCAGCTTGGTGTACGGACACGATGGATTTCGCGGTGAGCTGGGACACATGATCGTTTCGCCGA  
GAI 7802 AGGACTTCATCGTTATCACGCTCGTACGGGGTTCGGAAGCGGCATAGTAGTCAATGGCAGCTTGGTGTACGGACACGATGGATTTCGCGGTGAGCTGGGACACATGATCGTTTCGCCGA  
TDC60 AGGACTTCATCGTTATCACGCTCGTACGGGGTTCGGAAGCGGCATAGTAGTCAATGGCAGCTTGGTGTACGGACACGATGGATTTCGCGGTGAGCTGGGACACATGATCGTTTCGCCGA  
W83 AGGACTTCATCGTTATCACGCTCGTACGGGGTTCGGAAGCGGCATAGTAGTCAATGGCAGCTTGGTGTACGGACACGATGGATTTCGCGGTGAGCTGGGACACATGATCGTTTCGCCGA  
SUE3 AGGACTTCATCGTTATCACGCTCGTACGGGGTTCGGAAGCGGCATAGTAGTCAATGGCAGCTTGGTGTACGGACACGATGGATTTCGCGGTGAGCTGGGACACATGATCGTTTCGCCGA  
TDC275 AGGACTTCATCGTTATCACGCTCGTACGGGGTTCGGAAGCGGCATAGTAGTCAATGGCAGCTTGGTGTACGGACACGATGGATTTCGCGGTGAGCTGGGACACATGATCGTTTCGCCGA  
TDC117 AGGACTTCATCGTTATCACGCTCGTACGGGGTTCGGAAGCGGCATAGTAGTCAATGGCAGCTTGGTGTACGGACACGATGGATTTCGCGGTGAGCTGGGACACATGATCGTTTCGCCGA  
\*\*\*\*\*

515 634  
33277 ATGGTCGATGTGCGGTTTGGGCAGACAGGGCTGTCTCGAGACTTACACCTCTGTCTACAGGAGTAGCCCGTACAGCTCGTGAATATCTGGACATCCGTTCCGACAAGAGCTTGTCTCCGA  
GAI 7802 ATGGTCGATGTGCGGTTTGGGCAGACAGGGCTGTCTCGAGACTTACACCTCTGTCTACAGGAGTAGCCCGTACAGCTCGTGAATATCTGGACATCCGTTCCGACAAGAGCTTGTCTCCGA  
TDC60 ATGGTCGATGTGCGGTTTGGGCAGAGAGGGCTGTCTCGAGACTTACACCTCTGTCTACAGGAGTAGCCCGTACAGCTCGTGAATATCTGGACATCCGTTCCGACAAGAGCTTGTCTCCGA  
W83 ATGGTCGATGTGCGGTTTGGGCAGAGAGGGCTGTCTCGAGACTTACACCTCTGTCTACAGGAGTAGCCCGTACAGCTCGTGAATATCTGGACATCCGTTCCGACAAGAGCTTGTCTCCGA  
SUE3 ATGGTCGATGTGCGGTTTGGGCAGACAGGGCTGTCTCGAGACTTACACCTCTGTCTACAGGAGTAGCCCGTACAGCTCGTGAATATCTGGACATCCGTTCCGACAAGAGCTTGTCTCCGA  
TDC275 ATGGTCGATGTGCGGTTTGGGCAGACAGGGCTGTCTCGAGACTTACACCTCTGTCTACAGGAGTAGCCCGTACAGCTCGTGAATATCTGGACATCCGTTCCGACAAGAGCTTGTCTCCGA  
TDC117 ATGGTCGATGTGCGGTTTGGGCAGACAGGGCTGTCTCGAGACTTACACCTCTGTCTACAGGAGTAGCCCGTACAGCTCGTGAATATCTGGACATCCGTTCCGACAAGAGCTTGTCTCCGA  
\*\*\*\*\*

635 754  
33277 ACATTCAGCCCGATCTGATACCGTGAGTTCGATATAAAGAAATGGCACAAACCATTTGTTTATAGTGTGTTTATTTTCACACAGTGTTTTCAGGCACATATATGCTTTTCAGATGGCT  
GAI 7802 ACATTCAGCCCGATCTGATACCGTGAGTTCGATATAAAGAAATGGCACAAACCATTTGTTTATAGTGTGTTTATTTTCACACAGTGTTTTCAGGCACATATATGCTTTTCAGATGGCT  
TDC60 ACATTCAGCCCGATCTGATACCGTGAGTTCGATATAAAGAAATGGCACAAACCATTTGTTTATAGTGTGTTTATTTTCACACAGTGTTTTCAGGCACATATATGCTTTTCAGATGGCT  
W83 ACATTCAGCCCGATCTGATACCGTGAGTTCGATATAAAGAAATGGCACAAACCATTTGTTTATAGTGTGTTTATTTTCACACAGTGTTTTCAGGCACATATATGCTTTTCAGATGGCT  
SUE3 ACATTCAGCCCGATCTGATACCGTGAGTTCGATATAAAGAAATGGCACAAACCATTTGTTTATAGTGTGTTTATTTTCACACAGTGTTTTCAGGCACATATATGCTTTTCAGATGGCT  
TDC275 ACATTCAGCCCGATCTGATACCGTGAGTTCGATATAAAGAAATGGCACAAACCATTTGTTTATAGTGTGTTTATTTTCACACAGTGTTTTCAGGCACATATATGCTTTTCAGATGGCT  
TDC117 ACATTCAGCCCGATCTGATACCGTGAGTTCGATATAAAGAAATGGCACAAACCATTTGTTTATAGTGTGTTTATTTTCACACAGTGTTTTCAGGCACATATATGCTTTTCAGATGGCT  
\*\*\*\*\*

755 MITE239 874  
33277 TTTTATCTACATCTGSAACCCCAATGACTTAGAAGCCCGCCCTCTCCCGGATCATTATGCGACCGGAGAATACAAAAGAGTATGATTTACAGCTACTTGTATTTTTATGGTATGCTCG  
GAI 7802 TTTTATCTACATCTGSAACCCCAATGACTTAGAAGCCCGCCCTCTCCCGGATCATTATGCGACCGGAGAATACAAAAGAGTATGATTTACAGCTACTTGTATTTTTATGGTATGCTCG  
TDC60  
W83  
SUE3  
TDC275  
TDC117

875

994

33277 CTTAGATCGAACATGGCCFGATCTGATCACTTCGAAAGATGTTTACGATGCAGCTATCAGTGGCGATGGCCCTTGCTCAAGAGATAITTCGAGACTACGGGAGCCATCCTCGGAGAGGCTTTT  
 GAI 7802 -----CACTTCGAAAGATGTTTACGATGCAGCTATCAGTGGCGATGGCCCTTGCTCAAGAGATAITTCGAGACTACGGGAGCCATCCTCGGAGAGGCTTTT  
 TDC60 -----CACTTCGAAAGATGTTTACGATGCAGCTATCAGTGGCGATGGCCCTTGCTCAAGAGATAITTCGAGACTACGGGAGCCATCCTCGGAGAGGCTTTT  
 W83 -----CACTTCGAAAGATGTTTACGATGCAGCTATCAGTGGCGATGGCCCTTGCTCAAGAGATAITTCGAGACTACGGGAGCCATCCTCGGAGAGGCTTTT  
 SU63 -----CACTTCGAAAGATGTTTACGATGCAGCTATCAGTGGCGATGGCCCTTGCTCAAGAGATAITTCGAGACTACGGGAGCCATCCTCGGAGAGGCTTTT  
 TDC275 -----CACTTCGAAAGATGTTTACGATGCAGCTATCAGTGGCGATGGCCCTTGCTCAAGAGATAITTCGAGACTACGGGAGCCATCCTCGGAGAGGCTTTT  
 TDC117 -----CACTTCGAAAGATGTTTACGATGCAGCTATCAGTGGCGATGGCCCTTGCTCAAGAGATAITTCGAGACTACGGGAGCCATCCTCGGAGAGGCTTTT  
 \*\*\*\*\*

991

1114

33277 GCGGACTTCGTTACATTTCTCCAGTCCGGAAGCGATCATCTCTTCGGTGGTCTTACCAAAGCAGGTGACCTGCTGATGAATCCGATCCGCCACCACATGGAAAAGAAATGTGCTGAATATC  
 GAI 7802 GCGGACTTCGTTACCTTTCTCCAGTCCGGAAGCGATCATCTCTTCGGTGGTCTTACCAAAGCAGGTGACCTGCTGATGAATCCGATCCGCCACCACATGGAAAAGAAATGTGCTGAATATC  
 TDC60 GCGGACTTCGTTACATTTCTCCAGTCCGGAAGCGATCATCTCTTCGGTGGTCTGACCAAAGCAGGTGACCTGCTGATGAATCCGATCCGCCACCACATGGAAAAGAAATGTGCTGAATATC  
 W83 GCGGACTTCGTTACCTTTCTCCAGTCCGGAAGCGATCATCTCTTCGGTGGTCTTACCAAAGCAGGTGACCTGCTGATGAATCCGATCCGCCACCACATGGAAAAGAAATGTGCTGAATATC  
 SU63 GCGGACTTCGTTACATTTCTCCAGTCCGGAAGCGATCATCTCTTCGGTGGTCTTACCAAAGCAGGTGACCTGCTGATGAATCCGATCCGCCACCACATGGAAAAGAAATGTGCTGAATATC  
 TDC275 GCGGACTTCGTTACATTTCTCCAGTCCGGAAGCGATCATCTCTTCGGTGGTCTTACCAAAGCAGGTGACCTGCTGATGAATCCGATCCGCCACCACATGGAAAAGAAATGTGCTGAATATC  
 TDC117 GCGGACTTCGTTACCTTTCTCCAGTCCGGAAGCGATCATCTCTTCGGTGGTCTGACCAAAGCAGGTGACCTGCTGATGAATCCGATCCGCCACCACATGGAAAAGAAATGTGCTGAATATC  
 \*\*\*\*\*

1115

PQN\_0382

1234

33277 TACCAGGGGAAGACCAAGCTGCTCTTCTCTCAGCTCAAAGAGAGCGATGCCGCTGTGCTCGGGGCAAGTGCTTTGGGATGGGAGGCAAAAATAAAGCTGAGCATCCGCTCGCACCTTTCA  
 GAI 7802 TACCAGGGGAAGACCAAGCTGCTCTTCTCTCAGCTCAAAGAGAGCGATGCCGCTGTGCTCGGGGCAAGTGCTTTGGGATGGGAGGCAAAAATAAAGCTGAGCATCCGCTCGCACCTTTCA  
 TDC60 TACCAGGGGAAGACCAAGCTGCTCTTCTCTCAGCTCAAAGAGAGCGATGCCGCTGTGCTCGGGGCAAGTGCTTTGGGATGGGAGGCAAAAATAAAGCTGAGCATCCGCTCGCACCTTTCA  
 W83 TACCAGGGGAAGACCAAGCTGCTCTTCTCTCAGCTCAAAGAGAGCGATGCCGCTGTGCTCGGGGCAAGTGCTTTGGGATGGGAGGCAAAAATAAAGCTGAGCATCCGCTCGCACCTTTCA  
 SU63 TACCAGGGGAAGACCAAGCTGCTCTTCTCTCAGCTCAAAGAGAGCGATGCCGCTGTGCTCGGGGCAAGTGCTTTGGGATGGGAGGCAAAAATAAAGCTGAGCATCCGCTCGCACCTTTCA  
 TDC275 TACCAGGGGAAGACCAAGCTGCTCTTCTCTCAGCTCAAAGAGAGCGATGCCGCTGTGCTCGGGGCAAGTGCTTTGGGATGGGAGGCAAAAATAAAGCTGAGCATCCGCTCGCACCTTTCA  
 TDC117 TACCAGGGGAAGACCAAGCTGCTCTTCTCTCAGCTCAAAGAGAGCGATGCCGCTGTGCTCGGGGCAAGTGCTTTGGGATGGGAGGCAAAAATAAAGCTGAGCATCCGCTCGCACCTTTCA  
 \*\*\*\*\*TAA  
 stop

1235

1354

33277 GATACTGTCCGCGCTGCGGAAACGATGGTTTTGCGGAGAGAAACCCGAAAGCCAAATCGTGTCCGAAGTGCGGATTGATTTATATGCCAATCCTTCTGCTGCGACGGCTGTGTTTCATTA  
 GAI 7802 GATACTGTCCGCGCTGCGGAAACGATGGTTTTGCGGAGAGAAACCCGAAAGCCAAATCGTGTCCGAAGTGCGGATTGATTTATATGCCAATCCTTCTGCTGCGACGGCTGTGTTTCATTA  
 TDC60 GATACTGTCCGCGCTGCGGAAACGATGGTTTTGCGGAGAGAAACCCGAAAGCCAAATCGTGTCCGAAGTGCGGATTGATTTATATGCCAATCCTTCTGCTGCGACGGCTGTGTTTCATTA  
 W83 GATACTGTCCGCGCTGCGGAAACGATGGTTTTGCGGAGAGAAACCCGAAAGCCAAATCGTGTCCGAAGTGCGGATTGATTTATATGCCAATCCTTCTGCTGCGACGGCTGTGTTTCATTA  
 SU63 GATACTGTCCGCGCTGCGGAAACGATGGTTTTGCGGAGAGAAACCCGAAAGCCAAATCGTGTCCGAAGTGCGGATTGATTTATATGCCAATCCTTCTGCTGCGACGGCTGTGTTTCATTA  
 TDC275 GATACTGTCCGCGCTGCGGAAACGATGGTTTTGCGGAGAGAAACCCGAAAGCCAAATCGTGTCCGAAGTGCGGATTGATTTATATGCCAATCCTTCTGCTGCGACGGCTGTGTTTCATTA  
 TDC117 GATACTGTCCGCGCTGCGGAAACGATGGTTTTGCGGAGAGAAACCCGAAAGCCAAATCGTGTCCGAAGTGCGGATTGATTTATATGCCAATCCTTCTGCTGCGACGGCTGTGTTTCATTA  
 \*\*\*\*\*

1355

1426

33277 CCGATAGTGCGGGAGACTATTGGCCGTGCGCCGAGCCAAAGATCCGGCCAAAGGCACACTCGATTTGCCCG  
 GAI 7802 CCGATAGCGCAGGACACTATTGGCCGTGCGCCGAGCCAAAGATCCGGCCAAAGGCACACTCGATTTGCCCG  
 TDC60 CCGATAGCGCGGACACTATTGGCCGTGCGCCGAGCCAAAGATCCGGCCAAAGGCACACTCGATTTGCCCG  
 W83 CCGATAGCGCGGACACTATTGGCCGTGCGCCGAGCCAAAGATCCGGCCAAAGGCACACTCGATTTGCCCG  
 SU63 CCGATAGCGCGGACACTATTGGCCGTGCGCCGAGCCAAAGATCCGGCCAAAGGCACACTCGATTTGCCCG  
 TDC275 CCGATAGCGCGGACACTATTGGCCGTGCGCCGAGCCAAAGATCCGGCCAAAGGCACACTCGATTTGCCCG  
 TDC117 CCGATAGCGCGGACACTATTGGCCGTGCGCCGAGCCAAAGATCCGGCCAAAGGCACACTCGATTTGCCCG  
 \*\*\*\*\*

Supplementary Table 1. Primers used in this study

| target region     | primer name  | sequence                  |
|-------------------|--------------|---------------------------|
| <i>rnm</i> operon | rrn1-Up      | CACAAGTCAGAACATGGCCGATGAC |
|                   | rrn1-Down    | GAGATGTCCGAAAGTCCATGTCACC |
|                   | rrn2-Up      | GTTGTAGGACAGCAACCTTTGGCG  |
|                   | rrn2-Down    | GCTATGGATATTCTGCGGTGTACGG |
|                   | rrn3-Up      | AGATAGCCAGTTTCGTTACGTCCGC |
|                   | rrn3-Down    | ATACAGCAACGGTTACTTCCGCGAC |
|                   | rrn4-Up      | AACACTCCCCACCGGCAAAAACATC |
|                   | rrn4-Down    | TATCGCAGGCACAAACCGCTTTACC |
| CTnPg1-a          | CTnPg1-up    | ATCCGTCCACGTGTGTGATATTGT  |
|                   | CTnPg1-down  | GATTCATACGGCGGGAGTAAC     |
|                   | CTnPg1-left  | TATACCTCCTCATCGGACAGACC   |
|                   | CTnPg1-right | GTTTTGGTAACGCTGCTCTGTC    |
| Glucose kinase    | Glyco-up     | TATCTGGTACCTCCTGCCC       |
|                   | Glyco-down   | ATCCTGTCTCCTCACGGAT       |
|                   | Glk-Real-F   | ATGTAGGCGGATCCAACACC      |
|                   | Glk-Real-R   | CCGGCAGTCAGATCTTTGAT      |
| Kgp               | Kgp-Real-F   | ATGTGGCAGGTAATCTTGC       |
|                   | Kgp-Real-R   | AGCCTGATTCTGAGGCAGAG      |
| 16S rRNA          | 16S-Real-F   | CTTGACTTCAGTGGCGGCA       |
|                   | 16S-Real-R   | AGGGAAGACGGTTTTACCA       |

Supplementary Table 2. Newly annotated 114 CDSs (PGa No.) of the W83 genome in this study

| PG#     | start   | stop    | strand | length(aa) | product                                                                                                    |
|---------|---------|---------|--------|------------|------------------------------------------------------------------------------------------------------------|
| PGa0001 | 6487    | 6642    | +      | 51         | hypothetical protein                                                                                       |
| PGa0002 | 35136   | 34594   | -      | 180        | putative SpoU rRNA methylase family protein                                                                |
| PGa0003 | 41766   | 41984   | +      | 72         | hypothetical protein                                                                                       |
| PGa0004 | 62287   | 62556   | +      | 89         | <i>ISPgI</i> , transposase, partial                                                                        |
| PGa0005 | 62562   | 63281   | +      | 239        | <i>ISPgI</i> , transposase, partial                                                                        |
| PGa0006 | 82439   | 82020   | -      | 139        | hypothetical protein                                                                                       |
| PGa0007 | 119278  | 118853  | -      | 141        | hypothetical protein similar to PG2076                                                                     |
| PGa0008 | 128357  | 128061  | -      | 98         | hypothetical protein similar to PG1787                                                                     |
| PGa0009 | 135230  | 136030  | +      | 266        | conserved hypothetical protein                                                                             |
| PGa0010 | 154352  | 153042  | -      | 436        | putative CDP-glycerol glycerophosphotransferase                                                            |
| PGa0011 | 168495  | 168109  | -      | 128        | putative protein-export transmembrane protein                                                              |
| PGa0012 | 189608  | 189348  | -      | 86         | hypothetical protein                                                                                       |
| PGa0013 | 198679  | 199101  | +      | 140        | partial Mfa1 fimbriin                                                                                      |
| PGa0014 | 200458  | 201843  | +      | 461        | partial Mfa1 fimbriin                                                                                      |
| PGa0015 | 223466  | 223284  | -      | 60         | <i>ISPg6</i> , transposase, partial                                                                        |
| PGa0016 | 223791  | 223576  | -      | 71         | <i>ISPg6</i> , transposase, partial                                                                        |
| PGa0017 | 236419  | 236577  | +      | 52         | hypothetical protein similar to PG1426                                                                     |
| PGa0018 | 299068  | 298868  | -      | 66         | <i>ISPgI</i> , transposase, partial                                                                        |
| PGa0019 | 326843  | 327433  | +      | 196        | putative chromate transport protein                                                                        |
| PGa0020 | 327452  | 328045  | +      | 197        | chromate transport protein                                                                                 |
| PGa0021 | 335816  | 335691  | -      | 41         | hypothetical protein similar to PG0297                                                                     |
| PGa0022 | 336545  | 336207  | -      | 112        | <i>ISPg3</i> , transposase, partial                                                                        |
| PGa0023 | 422084  | 422332  | +      | 82         | putative preprotein translocase SecE subunit                                                               |
| PGa0024 | 461786  | 461989  | +      | 67         | hypothetical protein                                                                                       |
| PGa0025 | 514604  | 515005  | +      | 133        | hypothetical protein                                                                                       |
| PGa0026 | 586913  | 586698  | -      | 71         | hypothetical protein                                                                                       |
| PGa0027 | 607412  | 607624  | +      | 70         | hypothetical protein                                                                                       |
| PGa0028 | 696004  | 694832  | -      | 390        | tonB-linked receptor Tlr, frame-shifted with PGN_0683                                                      |
| PGa0029 | 697076  | 695718  | -      | 452        | tonB-linked receptor Tlr, frame-shifted with PGN_0683                                                      |
| PGa0030 | 715388  | 715894  | +      | 168        | conserved hypothetical protein frame-shifted with PGN_0702                                                 |
| PGa0031 | 715858  | 716475  | +      | 205        | conserved hypothetical protein with a phosphotransferase enzyme family domain, frame-shifted with PGN_0702 |
| PGa0032 | 782156  | 780975  | -      | 393        | pseudouridine synthase                                                                                     |
| PGa0033 | 803453  | 804211  | +      | 252        | pseudouridine synthase                                                                                     |
| PGa0034 | 811778  | 811059  | -      | 239        | <i>ISPgI</i> , transposase, partial                                                                        |
| PGa0035 | 812140  | 811784  | -      | 118        | <i>ISPgI</i> , transposase, partial                                                                        |
| PGa0036 | 814830  | 815186  | +      | 118        | <i>ISPgI</i> , transposase, partial                                                                        |
| PGa0037 | 815192  | 815911  | +      | 239        | <i>ISPgI</i> , transposase, partial                                                                        |
| PGa0038 | 858188  | 857958  | -      | 76         | hypothetical protein similar to PG1251                                                                     |
| PGa0039 | 873915  | 873736  | -      | 59         | <i>ISPgI</i> , transposase, partial                                                                        |
| PGa0040 | 874162  | 873938  | -      | 74         | <i>ISPgI</i> , transposase, partial                                                                        |
| PGa0041 | 874751  | 874251  | -      | 166        | <i>ISPgI</i> , transposase, partial                                                                        |
| PGa0042 | 875588  | 874839  | -      | 249        | <i>ISPgI</i> , transposase, partial                                                                        |
| PGa0043 | 895133  | 894084  | -      | 349        | integrase                                                                                                  |
| PGa0044 | 906634  | 905915  | -      | 239        | <i>ISPgI</i> , transposase, partial                                                                        |
| PGa0045 | 906996  | 906640  | -      | 118        | <i>ISPgI</i> , transposase, partial                                                                        |
| PGa0046 | 907656  | 907018  | -      | 212        | probable integrase                                                                                         |
| PGa0047 | 913013  | 913369  | +      | 118        | <i>ISPgI</i> , transposase, partial                                                                        |
| PGa0048 | 913375  | 914094  | +      | 239        | <i>ISPgI</i> , transposase, partial                                                                        |
| PGa0049 | 988353  | 987640  | -      | 237        | hypothetical protein                                                                                       |
| PGa0050 | 1001219 | 1000500 | -      | 239        | <i>ISPgI</i> , transposase, partial                                                                        |
| PGa0051 | 1001581 | 1001225 | -      | 118        | <i>ISPgI</i> , transposase, partial                                                                        |
| PGa0052 | 1004952 | 1004410 | -      | 180        | <i>ISPgI</i> , transposase, partial                                                                        |
| PGa0053 | 1025199 | 1024489 | -      | 236        | probable CDP-diacylglycerol-serine O-phosphatidyltransferase                                               |

|         |         |         |   |      |                                                       |
|---------|---------|---------|---|------|-------------------------------------------------------|
| PGa0054 | 1049668 | 1049243 | - | 141  | IS <i>PgI</i> , transposase, partial                  |
| PGa0055 | 1050326 | 1049757 | - | 189  | IS <i>PgI</i> , transposase, partial                  |
| PGa0056 | 1085800 | 1085201 | - | 199  | probable para-aminobenzoate synthase component I      |
| PGa0057 | 1086820 | 1085807 | - | 337  | putative para-aminobenzoate synthase component I      |
| PGa0058 | 1184183 | 1183506 | - | 225  | conserved hypothetical protein                        |
| PGa0059 | 1184906 | 1184205 | - | 233  | conserved hypothetical protein                        |
| PGa0060 | 1198996 | 1197677 | - | 439  | pseudouridine synthase                                |
| PGa0061 | 1228291 | 1227332 | - | 319  | peptide chain release factor RF-2                     |
| PGa0062 | 1235147 | 1235752 | + | 201  | conserved hypothetical protein                        |
| PGa0063 | 1241429 | 1240071 | - | 452  | cobyric acid synthase                                 |
| PGa0064 | 1269922 | 1269659 | - | 87   | IS <i>Pg2</i> , transposase, partial                  |
| PGa0065 | 1279266 | 1278262 | - | 334  | putative transcriptional regulator                    |
| PGa0066 | 1299868 | 1301499 | + | 543  | transglycosylase                                      |
| PGa0067 | 1305183 | 1304464 | - | 239  | IS <i>PgI</i> , transposase, partial                  |
| PGa0068 | 1305545 | 1305189 | - | 118  | IS <i>PgI</i> , transposase, partial                  |
| PGa0069 | 1313669 | 1312986 | - | 227  | putative pseudouridine synthase                       |
| PGa0070 | 1410604 | 1411761 | + | 385  | putative NAD(P)(+) transhydrogenase (AB-specific)     |
| PGa0071 | 1411871 | 1412185 | + | 104  | probable NAD(P) transhydrogenase subunit alpha part 2 |
| PGa0072 | 1430600 | 1429881 | - | 239  | IS <i>PgI</i> , transposase, partial                  |
| PGa0073 | 1430956 | 1430606 | - | 116  | IS <i>PgI</i> , transposase, partial                  |
| PGa0074 | 1463878 | 1464234 | + | 118  | IS <i>PgI</i> , transposase, partial                  |
| PGa0075 | 1464240 | 1464959 | + | 239  | IS <i>PgI</i> , transposase, partial                  |
| PGa0076 | 1482344 | 1481625 | - | 239  | IS <i>PgI</i> , transposase, partial                  |
| PGa0077 | 1482706 | 1482350 | - | 118  | IS <i>PgI</i> , transposase, partial                  |
| PGa0078 | 1595556 | 1594936 | - | 206  | IS <i>Pg3</i> , transposase, partial                  |
| PGa0079 | 1618623 | 1619399 | + | 258  | tRNA pseudouridine synthase B                         |
| PGa0080 | 1624846 | 1627503 | + | 885  | Pr <i>T</i> cysteine protease/hemagglutinin           |
| PGa0081 | 1724068 | 1721861 | - | 735  | cation-transporting ATPase                            |
| PGa0082 | 1724367 | 1724104 | - | 87   | hypothetical protein                                  |
| PGa0083 | 1759812 | 1760174 | + | 120  | probable partial hemagglutinin-related protein        |
| PGa0084 | 1760051 | 1760386 | + | 111  | probable partial hemagglutinin-related protein        |
| PGa0085 | 1765568 | 1766065 | + | 165  | putative ABC-type transporter ATP-binding protein     |
| PGa0086 | 1793919 | 1792945 | - | 324  | probable pseudouridine synthase                       |
| PGa0087 | 1823492 | 1823157 | - | 111  | putative partial transcriptional repressor            |
| PGa0088 | 1824230 | 1823574 | - | 218  | putative partial transcriptional repressor            |
| PGa0089 | 1843634 | 1843843 | + | 69   | hypothetical protein                                  |
| PGa0090 | 1939821 | 1945016 | + | 1731 | lysine-specific cysteine proteinase                   |
| PGa0091 | 1945284 | 1945640 | + | 118  | IS <i>PgI</i> , transposase, partial                  |
| PGa0092 | 1945646 | 1945915 | + | 89   | IS <i>PgI</i> , transposase, partial                  |
| PGa0093 | 1988553 | 1989611 | + | 352  | hypothetical protein                                  |
| PGa0094 | 2005261 | 2005001 | - | 86   | IS <i>Pg3</i> transposase, partial                    |
| PGa0095 | 2007246 | 2006695 | - | 183  | IS <i>Pg3</i> transposase, partial                    |
| PGa0096 | 2009798 | 2009079 | - | 239  | IS <i>PgI</i> transposase, partial                    |
| PGa0097 | 2039449 | 2039727 | + | 92   | hypothetical protein similar to PG1547                |
| PGa0098 | 2046082 | 2045909 | - | 57   | hypothetical protein                                  |
| PGa0099 | 2048288 | 2048139 | - | 49   | hypothetical protein                                  |
| PGa0100 | 2052066 | 2051440 | - | 208  | conserved hypothetical protein                        |
| PGa0101 | 2055075 | 2056247 | + | 390  | partial chloride channel protein                      |
| PGa0102 | 2080809 | 2079226 | - | 527  | conserved hypothetical protein                        |
| PGa0103 | 2101989 | 2101270 | - | 239  | IS <i>PgI</i> , transposase, partial                  |
| PGa0104 | 2102351 | 2101995 | - | 118  | IS <i>PgI</i> , transposase, partial                  |
| PGa0105 | 2154260 | 2153955 | - | 101  | IS <i>Pg2</i> , transposase, partial                  |
| PGa0106 | 2156466 | 2156783 | + | 105  | IS <i>PgI</i> , transposase, partial                  |
| PGa0107 | 2156789 | 2157508 | + | 239  | IS <i>PgI</i> , transposase, partial                  |
| PGa0108 | 2222925 | 2223965 | + | 346  | hypothetical protein                                  |
| PGa0109 | 2230037 | 2229726 | - | 103  | IS <i>Pg2</i> , transposase, partial                  |
| PGa0110 | 2274662 | 2274886 | + | 74   | IS <i>PgI</i> , transposase, partial                  |

|         |         |         |   |     |                                            |
|---------|---------|---------|---|-----|--------------------------------------------|
| PGa0111 | 2275269 | 2275988 | + | 239 | <i>IS<i>PgI</i></i> , transposase, partial |
| PGa0112 | 2300430 | 2299711 | - | 239 | <i>IS<i>PgI</i></i> , transposase, partial |
| PGa0113 | 2300792 | 2300436 | - | 118 | <i>IS<i>PgI</i></i> , transposase, partial |
| PGa0114 | 2303753 | 2304634 | + | 293 | immunoreactive 32 kD antigen PG25          |

---

Supplementary Table 3. The multi-copied CDS groups in ATCC 33277

| CDS group | product                                                 | representative CDS |          |          |          |          |          |
|-----------|---------------------------------------------------------|--------------------|----------|----------|----------|----------|----------|
| Cpgn01    | transposase in <i>ISPg1</i>                             | PGN_0027           | PGN_0104 | PGN_0587 | PGN_1077 | PGN_1319 | PGN_1839 |
|           |                                                         |                    | PGN_0108 | PGN_0602 | PGN_1110 | PGN_1397 | PGN_1901 |
|           |                                                         |                    | PGN_0130 | PGN_0605 | PGN_1118 | PGN_1420 | PGN_1926 |
|           |                                                         |                    | PGN_0131 | PGN_0644 | PGN_1132 | PGN_1433 | PGN_1957 |
|           |                                                         |                    | PGN_0210 | PGN_0749 | PGN_1161 | PGN_1442 |          |
|           |                                                         |                    | PGN_0212 | PGN_0834 | PGN_1177 | PGN_1619 |          |
|           |                                                         |                    | PGN_0218 | PGN_0842 | PGN_1191 | PGN_1644 |          |
|           |                                                         |                    | PGN_0324 | PGN_0918 | PGN_1216 | PGN_1669 |          |
|           |                                                         |                    | PGN_0575 | PGN_0971 | PGN_1276 | PGN_1727 |          |
|           |                                                         |                    | PGN_0577 | PGN_1008 | PGN_1280 | PGN_1838 |          |
| Cpgn02    | transposase in <i>ISPg3</i>                             | PGN_0442           | PGN_0106 | PGN_0790 | PGN_0953 | PGN_1066 | PGN_1911 |
|           |                                                         |                    | PGN_0107 | PGN_0864 | PGN_0955 | PGN_1278 | PGN_1913 |
|           |                                                         |                    | PGN_0425 | PGN_0879 | PGN_1006 | PGN_1279 | PGN_1922 |
|           |                                                         |                    | PGN_0454 | PGN_0909 | PGN_1060 | PGN_1428 |          |
|           |                                                         |                    | PGN_0459 | PGN_0934 | PGN_1064 | PGN_1726 |          |
|           |                                                         |                    | PGN_0585 | PGN_0944 | PGN_1065 | PGN_1836 |          |
| Cpgn03    | conserved hypothetical protein                          | PGN_1478           | PGN_0363 | PGN_0305 | PGN_0337 | PGN_0551 | PGN_1778 |
| Cpgn04    | transposase in <i>ISPg2</i>                             | PGN_1394           | PGN_0839 | PGN_1160 |          |          |          |
| Cpgn05    | conserved hypothetical protein                          | PGN_0951           | PGN_0105 | PGN_1277 | PGN_1915 |          |          |
| Cpgn06    | hypothetical protein                                    | PGN_0127           | PGN_0443 | PGN_0603 | PGN_1887 |          |          |
| Cpgn07    | conserved hypothetical protein                          | PGN_0216           | PGN_0439 | PGN_1399 | PGN_2048 |          |          |
| Cpgn08    | conserved hypothetical protein                          | PGN_0217           | PGN_0440 | PGN_1398 | PGN_2049 |          |          |
| Cpgn09    | conserved hypothetical protein                          | PGN_0215           | PGN_0438 | PGN_2047 |          |          |          |
| Cpgn10    | conserved hypothetical protein                          | PGN_1477           | PGN_0304 |          |          |          |          |
| Cpgn11    | hypothetical protein                                    | PGN_1082           | PGN_0479 | PGN_1083 |          |          |          |
| Cpgn12    | conserved hypothetical protein                          | PGN_0652           | PGN_0536 | PGN_1592 |          |          |          |
| Cpgn13    | hypothetical protein                                    | PGN_0979           | PGN_1102 | PGN_1257 |          |          |          |
| Cpgn14    | conserved hypothetical protein                          | PGN_0946           | PGN_1920 |          |          |          |          |
| Cpgn15    | ABC transporter ATP-binding protein                     | PGN_0949           | PGN_1917 |          |          |          |          |
| Cpgn16    | carboxyl-terminal processing protease                   | PGN_0952           | PGN_1914 |          |          |          |          |
| Cpgn17    | ABC transporter ATP-binding protein                     | PGN_0950           | PGN_1916 |          |          |          |          |
| Cpgn18    | conserved hypothetical protein                          | PGN_1821           | PGN_1824 |          |          |          |          |
| Cpgn19    | conserved protein found in conjugative transposon, TraM | PGN_0060           | PGN_1281 |          |          |          |          |
| Cpgn20    | putative TonB                                           | PGN_0103           | PGN_1275 |          |          |          |          |
| Cpgn21    | conserved hypothetical protein                          | PGN_0948           | PGN_1918 |          |          |          |          |
| Cpgn22    | conserved hypothetical protein                          | PGN_0050           | PGN_1291 |          |          |          |          |
| Cpgn23    | conserved hypothetical protein                          | PGN_0053           | PGN_1288 |          |          |          |          |
| Cpgn24    | diaminopimelate decarboxylase                           | PGN_0100           | PGN_1272 |          |          |          |          |
| Cpgn25    | hemagglutinin protein HagB                              | PGN_1904           | PGN_1906 |          |          |          |          |
| Cpgn26    | conserved hypothetical protein                          | PGN_1697           | PGN_0029 |          |          |          |          |
| Cpgn27    | conserved protein found in conjugative transposon, TraN | PGN_0059           | PGN_1282 |          |          |          |          |
| Cpgn28    | putative                                                | PGN_0101           | PGN_1273 |          |          |          |          |



| 1,4-dihydroxy-2-naphthoate<br>octaprenyltransferase |                                                                     |          |          |
|-----------------------------------------------------|---------------------------------------------------------------------|----------|----------|
| Cpgn29                                              | probable conserved protein found<br>in conjugative transposon, TraP | PGN_0057 | PGN_1284 |
| Cpgn30                                              | conserved hypothetical protein                                      | PGN_0306 | PGN_1237 |
| Cpgn31                                              | conserved hypothetical protein                                      | PGN_0947 | PGN_1919 |
| Cpgn32                                              | putative TetR family<br>transcriptional regulator                   | PGN_0945 | PGN_1921 |
| Cpgn33                                              | probable conserved protein found<br>in conjugative transposon       | PGN_0058 | PGN_1283 |
| Cpgn34                                              | partial transposase in <i>IS<i>Pgl</i></i>                          | PGN_0219 | PGN_0966 |
| Cpgn35                                              | probable elongation factor P                                        | PGN_0616 | PGN_1405 |
| Cpgn36                                              | probable anti-restriction protein                                   | PGN_0049 | PGN_1292 |
| Cpgn37                                              | probable lysozyme                                                   | PGN_0055 | PGN_1286 |
| Cpgn39                                              | DNA-binding protein,<br>histone-like family                         | PGN_0614 | PGN_1407 |
| Cpgn40                                              | DNA-binding protein,<br>histone-like family                         | PGN_0326 | PGN_0460 |
| Cpgn41                                              | probable conserved protein found<br>in conjugative transposon       | PGN_0056 | PGN_1285 |
| Cpgn42                                              | partial transposase in <i>IS<i>Pgl</i></i>                          | PGN_0220 | PGN_0967 |
| Cpgn43                                              | conserved hypothetical protein                                      | PGN_0048 | PGN_1293 |
| Cpgn44                                              | hypothetical protein                                                | PGN_0054 | PGN_1287 |
| Cpgn45                                              | conserved hypothetical protein                                      | PGN_0102 | PGN_1274 |
| Cpgn46                                              | conserved hypothetical protein                                      | PGN_0437 | PGN_2046 |
| Cpgn47                                              | conserved hypothetical protein                                      | PGN_1835 | PGN_1007 |
| Cpgn48                                              | hypothetical protein                                                | PGN_0046 | PGN_1295 |
| Cpgn49                                              | conserved hypothetical protein                                      | PGN_0051 | PGN_1290 |
| Cpgn50                                              | hypothetical protein                                                | PGN_0052 | PGN_1289 |
| Cpgn51                                              | conserved hypothetical protein                                      | PGN_0047 | PGN_1294 |
| Cpgn52                                              | hypothetical protein                                                | PGN_0615 | PGN_1406 |
| Cpgn53                                              | conserved hypothetical protein                                      | PGN_1910 | PGN_1936 |

Supplementary Table 4. The multi-copied CDS groups in W83

| CDS group | product                                  | representative CDS |         |         |         |         |         |
|-----------|------------------------------------------|--------------------|---------|---------|---------|---------|---------|
| Cpg01     | <i>ISPg1</i> , transposase               | PG0184             | PGa0004 | PG0825  | PG1177  | PGa0075 | PGa0103 |
|           |                                          |                    | PGa0005 | PGa0044 | PG1197  | PGa0076 | PGa0104 |
|           |                                          |                    | PG0460  | PGa0045 | PGa0067 | PGa0077 | PGa0106 |
|           |                                          |                    | PG0549  | PGa0047 | PGa0068 | PG1448  | PGa0107 |
|           |                                          |                    | PGa0034 | PGa0048 | PG1244  | PG1624  | PGa0110 |
|           |                                          |                    | PGa0035 | PGa0050 | PG1320  | PGa0091 | PGa0111 |
|           |                                          |                    | PGa0036 | PGa0051 | PGa0072 | PGa0092 | PGa0112 |
|           |                                          |                    | PGa0037 | PGa0052 | PGa0073 | PG1906  | PGa0113 |
|           |                                          |                    | PGa0042 | PG1031  | PGa0074 | PGa0096 |         |
| Cpg02     | <i>ISPg5</i> transposase Orf2            | PG0008             | PG0041  | PG0458  | PG0943  | PG1644  | PG2057  |
|           |                                          |                    | PG0426  | PG0591  | PG1420  | PG1710  | PG2128  |
| Cpg03     | <i>ISPg4</i> , transposase               | PG0019             | PG0050  | PG0225  | PG0970  | PG1658  | PG2194  |
|           |                                          |                    | PG0177  | PG0487  | PG1261  | PG1673  |         |
| Cpg04     | <i>ISPg5</i> transposase Orf1            | PG0590             | PG0009  | PG0427  | PG1419  | PG1709  | PG2129  |
|           |                                          |                    | PG0040  | PG0942  | PG1645  | PG2058  |         |
| Cpg05     | <i>ISPg3</i> , transposase               | PG0194             | PG0261  | PG1032  | PG1262  | PGa0094 | PGa0095 |
|           |                                          |                    | PG0798  |         |         |         |         |
| Cpg06     | <i>ISPg2</i> , transposase               | PG0277             | PG0865  | PG1350  | PG1746  | PG2176  |         |
| Cpg07     | hypothetical protein                     | PG0499             | PG1059  | PG1398  | PG2220  |         |         |
| Cpg08     | hypothetical protein                     | PG0101             | PG1266  | PG1671  | PG2075  |         |         |
| Cpg09     | hypothetical protein                     | PG0102             | PG1265  | PG1670  | PG2074  |         |         |
| Cpg10     | hypothetical protein                     | PG0103             | PG1264  | PG1669  | PG2073  |         |         |
| Cpg11     | <i>ISPg1</i> , transposase, partial      | PGa0054            | PGa0039 | PGa0040 |         |         |         |
| Cpg12     | hypothetical protein                     | PG0100             | PG1267  | PG1672  |         |         |         |
| Cpg13     | conserved hypothetical protein           | PG1526             | PG1512  |         |         |         |         |
| Cpg14     | MATE efflux family protein               | PG0827             | PG1446  |         |         |         |         |
| Cpg15     | integrase                                | PG0819             | PG1454  |         |         |         |         |
| Cpg16     | integrase                                | PG0820             | PG1453  |         |         |         |         |
| Cpg17     | hemagglutinin protein HagB               | PG1972             | PG1975  |         |         |         |         |
| Cpg18     | hypothetical protein                     | PG1757             | PG0031  |         |         |         |         |
| Cpg19     | transcriptional regulator, AraC family   | PG0826             | PG1447  |         |         |         |         |
| Cpg20     | conserved hypothetical protein           | PG0824             | PG1449  |         |         |         |         |
| Cpg21     | <i>ISPg1</i> , transposase, partial      | PGa0055            | PGa0041 |         |         |         |         |
| Cpg22     | translation elongation factor P          | PG0568             | PG1274  |         |         |         |         |
| Cpg23     | DNA-binding protein, histone-like family | PG0566             | PG1276  |         |         |         |         |
| Cpg24     | DNA-binding protein, histone-like family | PG0853             | PG2152  |         |         |         |         |
| Cpg25     | hypothetical protein                     | PG0829             | PG1444  |         |         |         |         |
| Cpg26     | hypothetical protein                     | PG0831             | PG1442  |         |         |         |         |
| Cpg27     | hypothetical protein                     | PG0822             | PG1451  |         |         |         |         |
| Cpg28     | lipoprotein, putative                    | PG0821             | PG1452  |         |         |         |         |
| Cpg29     | conserved hypothetical protein           | PG0823             | PG1450  |         |         |         |         |
| Cpg30     | hypothetical protein                     | PG1527             | PG1532  |         |         |         |         |
| Cpg31     | hypothetical protein                     | PG0265             | PG1426  |         |         |         |         |
| Cpg32     | hypothetical protein                     | PG1574             | PG0371  |         |         |         |         |

Supplementary Table 5. ATCC 33277-specific CDSs

| PGN No.  | product                        |                                                                                |   |
|----------|--------------------------------|--------------------------------------------------------------------------------|---|
| PGN_0018 | hypothetical protein           |                                                                                |   |
| PGN_0019 | hypothetical protein           |                                                                                |   |
| PGN_0028 | hypothetical protein           | *                                                                              |   |
| PGN_0032 | conserved hypothetical protein | *                                                                              |   |
| PGN_0036 | hypothetical protein           |                                                                                |   |
| PGN_0040 | hypothetical protein           |                                                                                |   |
| CTnPg1-a | PGN_0046                       | hypothetical protein                                                           |   |
|          | PGN_0047                       | conserved hypothetical protein                                                 |   |
|          | PGN_0048                       | conserved hypothetical protein                                                 |   |
|          | PGN_0049                       | probable anti-restriction protein                                              |   |
|          | PGN_0050                       | conserved hypothetical protein                                                 |   |
|          | PGN_0051                       | conserved hypothetical protein                                                 |   |
|          | PGN_0052                       | hypothetical protein                                                           |   |
|          | PGN_0053                       | conserved hypothetical protein                                                 |   |
|          | PGN_0054                       | hypothetical protein                                                           |   |
|          | PGN_0055                       | probable lysozyme                                                              | * |
|          | PGN_0056                       | probable conserved protein found in conjugative transposon                     | * |
|          | PGN_0057                       | probable conserved protein found in conjugative transposon, TraP               | * |
|          | PGN_0058                       | probable conserved protein found in conjugative transposon                     | * |
|          | PGN_0059                       | conserved protein found in conjugative transposon, TraN                        | * |
|          | PGN_0060                       | conserved protein found in conjugative transposon, TraM                        | * |
|          | PGN_0061                       | hypothetical protein                                                           |   |
|          | PGN_0062                       | putative conserved protein found in conjugative transposon, TraK               | * |
|          | PGN_0063                       | conserved transmembrane protein found in conjugative transposon, TraJ          | * |
|          | PGN_0064                       | putative conserved protein found in conjugative transposon, TraI               | * |
|          | PGN_0065                       | conserved protein found in conjugative transposon, TraG                        | * |
|          | PGN_0066                       | probable conserved transmembrane protein found in conjugative transposon, TraF | * |
|          | PGN_0067                       | probable conserved transmembrane protein found in conjugative transposon, TraE | * |
|          | PGN_0068                       | hypothetical protein                                                           |   |
|          | PGN_0069                       | probable conserved protein found in conjugative transposon, TraA               | * |
|          | PGN_0070                       | hypothetical protein                                                           |   |
|          | PGN_0071                       | hypothetical protein                                                           | * |
|          | PGN_0072                       | hypothetical protein                                                           | * |
|          | PGN_0073                       | putative conserved protein found in conjugative transposon, TraA               | * |
|          | PGN_0074                       | conserved hypothetical protein                                                 | * |
|          | PGN_0075                       | conserved hypothetical protein                                                 | * |
|          | PGN_0076                       | putative mobilization protein, TraG family                                     | * |
|          | PGN_0077                       | hypothetical protein                                                           |   |
|          | PGN_0078                       | hypothetical protein                                                           |   |
|          | PGN_0079                       | conserved hypothetical protein with DUF1016 domain                             |   |
|          | PGN_0080                       | probable tetracycline resistance element mobilization regulatory protein RteC  |   |
|          | PGN_0082                       | probable transcriptional regulator, AraC family                                | * |
|          | PGN_0083                       | conserved hypothetical protein                                                 | * |
|          | PGN_0084                       | DNA topoisomerase I                                                            | * |
|          | PGN_0085                       | hypothetical protein                                                           | * |
|          | PGN_0086                       | putative DNA methylase                                                         | * |
|          | PGN_0087                       | conserved hypothetical protein                                                 |   |
|          | PGN_0088                       | putative transcriptional regulator                                             | * |
|          | PGN_0089                       | hypothetical protein                                                           |   |
|          | PGN_0090                       | hypothetical protein                                                           |   |
|          | PGN_0091                       | hypothetical protein                                                           |   |
|          | PGN_0092                       | conserved hypothetical protein                                                 | * |
|          | PGN_0093                       | conserved hypothetical protein                                                 | * |
|          | PGN_0094                       | putative bacteriophage integrase                                               | * |
|          | PGN_0095                       | hypothetical protein                                                           |   |
|          | PGN_0098                       | hypothetical protein                                                           |   |

|           |          |                                                        |   |
|-----------|----------|--------------------------------------------------------|---|
|           | PGN_0102 | conserved hypothetical protein                         | * |
|           | PGN_0105 | conserved hypothetical protein                         | * |
|           | PGN_0109 | conserved hypothetical protein                         | * |
|           | PGN_0110 | hypothetical protein                                   |   |
|           | PGN_0111 | partial transposase in <i>ISPg6</i>                    | * |
|           | PGN_0112 | partial transposase Orf1 in <i>ISPg5</i>               | * |
|           | PGN_0113 | hypothetical protein                                   |   |
|           | PGN_0124 | hypothetical protein                                   |   |
|           | PGN_0146 | hypothetical protein                                   |   |
|           | PGN_0154 | conserved hypothetical protein                         | * |
|           | PGN_0155 | hypothetical protein                                   |   |
|           | PGN_0161 | putative thiamine biosynthesis protein ThiS            | * |
|           | PGN_0162 | conserved hypothetical protein                         | * |
|           | PGN_0163 | hypothetical protein                                   | * |
|           | PGN_0164 | conserved hypothetical protein                         | * |
|           | PGN_0165 | conserved hypothetical protein                         |   |
|           | PGN_0177 | hypothetical protein                                   |   |
|           | PGN_0180 | FimA type I fimbilin                                   | * |
|           | PGN_0181 | conserved hypothetical protein                         | * |
|           | PGN_0182 | conserved hypothetical protein                         | * |
|           | PGN_0183 | minor component FimC                                   | * |
|           | PGN_0184 | minor component FimD                                   | * |
|           | PGN_0185 | minor component FimE                                   | * |
|           | PGN_0186 | hypothetical protein                                   |   |
|           | PGN_0187 | conserved hypothetical protein                         | * |
|           | PGN_0214 | conserved hypothetical protein                         | * |
|           | PGN_0215 | conserved hypothetical protein                         | * |
|           | PGN_0222 | conserved hypothetical protein                         | * |
| GPI locus | PGN_0225 | probable glycosyltransferase                           | * |
|           | PGN_0226 | conserved hypothetical protein                         |   |
|           | PGN_0227 | probable glycosyl transferase, family 1                | * |
|           | PGN_0228 | probable coenzyme F390 synthetase                      | * |
|           | PGN_0229 | putative DNA-binding protein, histone-like family      | * |
|           | PGN_0231 | probable delta-aminolevulinic acid dehydratase         | * |
|           | PGN_0232 | probable glycosyl transferase, family 2                | * |
|           | PGN_0236 | conserved hypothetical protein                         | * |
|           | PGN_0244 | hypothetical protein                                   |   |
|           | PGN_0273 | conserved hypothetical protein                         | * |
|           | PGN_0280 | hypothetical protein                                   | * |
|           | PGN_0285 | pyridine nucleotide-disulphide oxidoreductase          | * |
|           | PGN_0286 | hypothetical protein frame-shifted with PGN0285        | * |
|           | PGN_0287 | Mfa1 fimbilin                                          | * |
|           | PGN_0292 | hypothetical protein                                   |   |
|           | PGN_0293 | receptor antigen A                                     | * |
|           | PGN_0294 | receptor antigen B                                     | * |
|           | PGN_0295 | C-terminal domain of Arg- and Lys-gingipain proteinase | * |
|           | PGN_0296 | conserved hypothetical protein                         | * |
|           | PGN_0304 | conserved hypothetical protein                         | * |
|           | PGN_0306 | conserved hypothetical protein                         | * |
|           | PGN_0323 | conserved hypothetical protein                         | * |
|           | PGN_0325 | hypothetical protein                                   |   |
|           | PGN_0339 | hypothetical protein                                   |   |
|           | PGN_0343 | hypothetical protein                                   |   |
|           | PGN_0344 | probable haloacid dehalogenase-like hydrolase          | * |
|           | PGN_0349 | upregulated in stationary phase protein A              | * |
|           | PGN_0362 | hypothetical protein                                   |   |
|           | PGN_0364 | hypothetical protein                                   | * |
|           | PGN_0372 | hypothetical protein                                   |   |
|           | PGN_0378 | putative exopolyphosphatase                            | * |
|           | PGN_0379 | conserved hypothetical protein                         | * |

|          |                                                                                |   |
|----------|--------------------------------------------------------------------------------|---|
| PGN_0380 | partial ROK family transcriptional repressor with glucose kinase domain        | * |
| PGN_0381 | partial ROK family transcriptional repressor with glucose kinase domain        | * |
| PGN_0401 | conserved hypothetical protein                                                 | * |
| PGN_0402 | hypothetical protein                                                           |   |
| PGN_0407 | hypothetical protein                                                           |   |
| PGN_0417 | conserved hypothetical protein                                                 | * |
| PGN_0430 | putative ATP-binding component of ABC transporter protein                      | * |
| PGN_0435 | probable partial hemagglutinin-related protein                                 | * |
| PGN_0437 | conserved hypothetical protein                                                 | * |
| PGN_0438 | conserved hypothetical protein                                                 | * |
| PGN_0441 | hypothetical protein                                                           |   |
| PGN_0449 | conserved hypothetical protein                                                 | * |
| PGN_0452 | conserved hypothetical protein                                                 |   |
| PGN_0453 | partial transposase Orf1 in <i>ISPg5</i>                                       |   |
| PGN_0455 | partial transposase Orf1 in <i>ISPg5</i>                                       |   |
| PGN_0458 | hypothetical protein                                                           |   |
| PGN_0467 | conserved hypothetical protein                                                 |   |
| PGN_0474 | hypothetical protein                                                           |   |
| PGN_0475 | hypothetical protein                                                           |   |
| PGN_0478 | partial transposase in <i>ISPg4</i>                                            | * |
| PGN_0479 | hypothetical protein                                                           |   |
| PGN_0480 | partial transposase in <i>ISPg4</i>                                            | * |
| PGN_0481 | hypothetical protein                                                           |   |
| PGN_0482 | probable immunoreactive 23 kDa antigen                                         | * |
| PGN_0488 | conserved hypothetical protein                                                 | * |
| PGN_0494 | hypothetical protein                                                           |   |
| PGN_0495 | conserved hypothetical protein                                                 | * |
| PGN_0505 | hypothetical protein                                                           |   |
| PGN_0506 | hypothetical protein                                                           |   |
| PGN_0536 | conserved hypothetical protein                                                 | * |
| PGN_0537 | probable transcriptional regulator, Crp family                                 | * |
| PGN_0541 | hypothetical protein                                                           |   |
| PGN_0552 | hypothetical protein                                                           |   |
| PGN_0558 | conserved hypothetical protein                                                 | * |
| PGN_0560 | hypothetical protein                                                           |   |
| PGN_0563 | conserved hypothetical protein                                                 |   |
| PGN_0572 | conserved hypothetical protein                                                 | * |
| PGN_0576 | hypothetical protein                                                           | * |
| CTnPg2   | PGN_0578 conserved hypothetical protein found in conjugative transposon        | * |
|          | PGN_0579 conserved hypothetical protein                                        | * |
|          | PGN_0580 conserved hypothetical protein                                        |   |
|          | PGN_0581 conserved hypothetical protein                                        | * |
|          | PGN_0582 DNA topoisomerase I                                                   | * |
|          | PGN_0583 conserved hypothetical protein                                        | * |
|          | PGN_0584 conserved hypothetical protein                                        | * |
|          | PGN_0586 conserved hypothetical protein                                        |   |
|          | PGN_0588 conserved hypothetical protein                                        |   |
|          | PGN_0589 conserved hypothetical protein                                        | * |
|          | PGN_0590 putative Fic family protein                                           |   |
|          | PGN_0591 conserved hypothetical protein                                        |   |
|          | PGN_0592 putative conserved protein found in conjugative transposon, TraQ      | * |
|          | PGN_0593 putative conserved protein found in conjugative transposon, TraO      | * |
|          | PGN_0594 conserved protein found in conjugative transposon, TraN               | * |
|          | PGN_0595 putative conserved protein found in conjugative transposon, TraM      | * |
|          | PGN_0596 conserved hypothetical protein found in conjugative transposon        |   |
|          | PGN_0597 putative conserved protein found in conjugative transposon, TraK      | * |
|          | PGN_0598 conserved transmembrane protein found in conjugative transposon, TraJ | * |
|          | PGN_0599 putative conserved protein found in conjugative transposon, TraI      | * |
|          | PGN_0600 conserved hypothetical protein                                        | * |
|          | PGN_0601 conserved hypothetical protein                                        |   |

|        |          |                                                   |   |
|--------|----------|---------------------------------------------------|---|
|        | PGN_0615 | hypothetical protein                              |   |
|        | PGN_0648 | conserved hypothetical protein                    | * |
|        | PGN_0651 | conserved hypothetical protein                    |   |
|        | PGN_0652 | conserved hypothetical protein                    | * |
|        | PGN_0653 | conserved hypothetical protein                    | * |
|        | PGN_0654 | conserved hypothetical protein                    | * |
|        | PGN_0657 | conserved hypothetical protein                    | * |
|        | PGN_0681 | hypothetical protein                              |   |
|        | PGN_0682 | hypothetical protein                              |   |
|        | PGN_0683 | TonB-linked receptor Tlr                          | * |
|        | PGN_0702 | conserved hypothetical protein                    | * |
|        | PGN_0703 | hypothetical protein                              |   |
|        | PGN_0712 | conserved hypothetical protein                    |   |
|        | PGN_0717 | conserved hypothetical protein                    | * |
|        | PGN_0719 | probable ABC transporter permease protein         | * |
|        | PGN_0730 | hypothetical protein                              |   |
|        | PGN_0731 | hypothetical protein                              |   |
|        | PGN_0734 | conserved hypothetical protein                    | * |
|        | PGN_0748 | hypothetical protein                              |   |
|        | PGN_0752 | hypothetical protein                              | * |
|        | PGN_0755 | hypothetical protein                              | * |
|        | PGN_0783 | putative DNA-binding protein, histone-like family | * |
|        | PGN_0784 | hypothetical protein                              |   |
|        | PGN_0785 | hypothetical protein                              |   |
|        | PGN_0793 | 4-alpha-glucanotransferase                        | * |
|        | PGN_0795 | conserved hypothetical protein                    | * |
|        | PGN_0798 | conserved hypothetical protein                    | * |
|        | PGN_0820 | hypothetical protein                              |   |
|        | PGN_0821 | hypothetical protein                              |   |
|        | PGN_0835 | conserved hypothetical protein                    |   |
|        | PGN_0840 | conserved hypothetical protein                    | * |
|        | PGN_0843 | conserved hypothetical protein                    | * |
|        | PGN_0849 | conserved hypothetical protein                    |   |
|        | PGN_0850 | conserved hypothetical protein                    |   |
|        | PGN_0851 | conserved hypothetical protein                    |   |
|        | PGN_0854 | hypothetical protein                              |   |
|        | PGN_0855 | hypothetical protein                              |   |
|        | PGN_0862 | Type III restriction enzyme, res subunit          |   |
|        | PGN_0863 | DNA methylase N-4/N-6                             |   |
|        | PGN_0873 | conserved hypothetical protein                    | * |
|        | PGN_0877 | SNF2-related helicase                             | * |
|        | PGN_0878 | hypothetical protein                              |   |
|        | PGN_0881 | conserved hypothetical protein                    | * |
|        | PGN_0892 | hypothetical protein                              |   |
|        | PGN_0899 | conserved hypothetical protein                    |   |
|        | PGN_0905 | putative dihydroorotate dehydrogenase             | * |
|        | PGN_0908 | hypothetical protein                              |   |
| CTnPg3 | PGN_0917 | tyrosine type site-specific recombinase           | * |
|        | PGN_0919 | hypothetical protein                              |   |
|        | PGN_0920 | putative partial excisionase                      |   |
|        | PGN_0921 | hypothetical protein                              |   |
|        | PGN_0922 | conserved hypothetical protein                    |   |
|        | PGN_0923 | putative DNA primase                              | * |
|        | PGN_0924 | mobilization protein                              | * |
|        | PGN_0925 | putative mobilization protein                     | * |
|        | PGN_0926 | conserved hypothetical protein                    |   |
|        | PGN_0927 | conserved hypothetical protein                    | * |
|        | PGN_0928 | conserved hypothetical protein                    |   |
|        | PGN_0929 | conserved hypothetical protein                    |   |
|        | PGN_0930 | hypothetical protein                              |   |

|          |                                               |   |
|----------|-----------------------------------------------|---|
| PGN_0931 | conserved hypothetical protein                |   |
| PGN_0932 | probable GCN5-related N-acetyltransferase     |   |
| PGN_0933 | probable transcriptional regulator            | * |
| <hr/>    |                                               |   |
| PGN_0937 | hypothetical protein                          |   |
| PGN_0939 | conserved hypothetical protein                | * |
| PGN_0940 | partial transposase in <i>ISPg2</i>           | * |
| PGN_0951 | conserved hypothetical protein                | * |
| PGN_0954 | partial transposase in <i>ISPg6</i>           | * |
| PGN_0956 | hypothetical protein                          | * |
| PGN_0959 | probable transcriptional regulator            | * |
| PGN_0972 | TPR domain protein                            | * |
| PGN_0978 | hypothetical protein                          |   |
| PGN_0979 | hypothetical protein                          |   |
| PGN_0983 | hypothetical protein                          |   |
| PGN_0991 | putative ribonuclease BN                      | * |
| PGN_0994 | conserved hypothetical protein                | * |
| PGN_0995 | TPR domain protein                            | * |
| PGN_0996 | TPR domain protein                            | * |
| PGN_1009 | calcium-transporting ATPase                   | * |
| PGN_1016 | conserved hypothetical protein                | * |
| PGN_1018 | conserved hypothetical protein                | * |
| PGN_1028 | conserved hypothetical protein                | * |
| PGN_1030 | hypothetical protein                          |   |
| PGN_1031 | conserved hypothetical protein                | * |
| PGN_1048 | hypothetical protein                          |   |
| PGN_1051 | hypothetical protein                          |   |
| PGN_1058 | putative bacterioferritin comigratory protein | * |
| PGN_1059 | conserved hypothetical protein                | * |
| PGN_1061 | conserved hypothetical protein                | * |
| PGN_1063 | partial transposase Orf2 in <i>ISPg5</i>      | * |
| PGN_1067 | hypothetical protein                          |   |
| PGN_1068 | conserved hypothetical protein                | * |
| PGN_1069 | hypothetical protein                          |   |
| PGN_1070 | hypothetical protein                          |   |
| PGN_1071 | hypothetical protein                          |   |
| PGN_1072 | hypothetical protein                          |   |
| PGN_1073 | hypothetical protein                          |   |
| PGN_1074 | hypothetical protein                          |   |
| PGN_1075 | hypothetical protein                          | * |
| PGN_1076 | putative DNA methylase                        | * |
| PGN_1082 | hypothetical protein                          |   |
| PGN_1083 | hypothetical protein                          |   |
| PGN_1084 | hypothetical protein                          |   |
| PGN_1086 | hypothetical protein                          |   |
| PGN_1099 | probable phosphoesterase                      | * |
| PGN_1101 | conserved hypothetical protein                |   |
| PGN_1102 | hypothetical protein                          |   |
| PGN_1109 | hypothetical protein                          |   |
| PGN_1114 | conserved hypothetical protein                | * |
| PGN_1122 | NADPH-NAD transhydrogenase beta subunit       | * |
| PGN_1129 | conserved hypothetical protein                | * |
| PGN_1133 | hypothetical protein                          |   |
| PGN_1143 | conserved hypothetical protein                | * |
| PGN_1144 | hypothetical protein                          |   |
| PGN_1167 | conserved hypothetical protein                | * |
| PGN_1180 | conserved hypothetical protein                | * |
| PGN_1183 | hypothetical protein                          |   |
| PGN_1192 | DNA-binding protein, histone-like family      | * |
| PGN_1199 | DNA-binding protein, histone-like family      | * |
| PGN_1210 | hypothetical protein                          |   |

|          |          |                                                                        |   |
|----------|----------|------------------------------------------------------------------------|---|
|          | PGN_1211 | hypothetical protein                                                   |   |
|          | PGN_1212 | hypothetical protein                                                   |   |
|          | PGN_1213 | putative ATP-binding protein                                           |   |
|          | PGN_1214 | hypothetical protein                                                   |   |
|          | PGN_1215 | hypothetical protein                                                   |   |
|          | PGN_1217 | hypothetical protein                                                   |   |
|          | PGN_1227 | TPR domain protein                                                     | * |
|          | PGN_1228 | hypothetical protein                                                   |   |
|          | PGN_1231 | hypothetical protein                                                   |   |
|          | PGN_1237 | hypothetical protein                                                   |   |
|          | PGN_1241 | hypothetical protein                                                   |   |
|          | PGN_1242 | conserved hypothetical protein                                         | * |
|          | PGN_1246 | hypothetical protein                                                   |   |
|          | PGN_1247 | hypothetical protein                                                   |   |
|          | PGN_1248 | hypothetical protein                                                   |   |
|          | PGN_1249 | conserved hypothetical protein                                         |   |
|          | PGN_1250 | hypothetical protein                                                   |   |
|          | PGN_1253 | hypothetical protein                                                   |   |
|          | PGN_1255 | putative heptosyltransferase                                           | * |
|          | PGN_1257 | hypothetical protein                                                   |   |
|          | PGN_1265 | hypothetical protein                                                   |   |
|          | PGN_1266 | conserved hypothetical protein                                         | * |
|          | PGN_1268 | putative oxidoreductase                                                | * |
|          | PGN_1274 | conserved hypothetical protein                                         | * |
|          | PGN_1277 | conserved hypothetical protein                                         | * |
| CTnPg1-b | PGN_1281 | putative conserved protein found in conjugative transposon, TraM       | * |
|          | PGN_1282 | conserved protein found in conjugative transposon, TraN                | * |
|          | PGN_1283 | conserved protein found in conjugative transposon, TraO                | * |
|          | PGN_1284 | putative DNA primase involved in conjugative transposon, TraP          | * |
|          | PGN_1285 | conserved protein found in conjugative transposon, TraQ                | * |
|          | PGN_1286 | probable lysozyme                                                      | * |
|          | PGN_1287 | conserved hypothetical protein                                         |   |
|          | PGN_1288 | conserved hypothetical protein                                         |   |
|          | PGN_1289 | conserved hypothetical protein                                         |   |
|          | PGN_1290 | conserved hypothetical protein                                         |   |
|          | PGN_1291 | conserved hypothetical protein related to phage                        |   |
|          | PGN_1292 | probable anti-restriction protein                                      |   |
|          | PGN_1293 | conserved hypothetical protein                                         |   |
|          | PGN_1294 | conserved hypothetical protein                                         |   |
|          | PGN_1295 | hypothetical protein                                                   |   |
|          | PGN_1299 | hypothetical protein                                                   |   |
|          | PGN_1306 | hypothetical protein                                                   |   |
|          | PGN_1307 | hypothetical protein                                                   |   |
|          | PGN_1320 | conserved hypothetical protein                                         | * |
|          | PGN_1323 | TPR domain protein                                                     | * |
|          | PGN_1324 | probable ABC transporter membrane protein                              |   |
|          | PGN_1325 | probable ABC transporter membrane protein                              |   |
|          | PGN_1326 | hypothetical protein                                                   |   |
|          | PGN_1327 | hypothetical protein                                                   | * |
|          | PGN_1328 | hypothetical protein                                                   |   |
|          | PGN_1329 | hypothetical protein                                                   | * |
|          | PGN_1330 | probable branched chain amino acid ABC transporter ATP-binding protein | * |
|          | PGN_1331 | conserved hypothetical protein                                         | * |
|          | PGN_1337 | conserved hypothetical protein                                         | * |
|          | PGN_1340 | conserved hypothetical protein                                         | * |
|          | PGN_1351 | conserved hypothetical protein                                         | * |
|          | PGN_1353 | conserved hypothetical protein                                         | * |
|          | PGN_1354 | conserved hypothetical protein                                         | * |
|          | PGN_1357 | conserved hypothetical protein                                         | * |
|          | PGN_1365 | conserved hypothetical protein                                         | * |



|          |                                                                   |   |
|----------|-------------------------------------------------------------------|---|
| PGN_1371 | hypothetical protein                                              |   |
| PGN_1379 | hypothetical protein                                              |   |
| PGN_1380 | hypothetical protein                                              |   |
| PGN_1384 | probable 1-acyl-sn-glycerol-3-phosphate acetyltransferase         | * |
| PGN_1385 | hypothetical protein                                              |   |
| PGN_1386 | conserved hypothetical protein                                    | * |
| PGN_1406 | hypothetical protein                                              |   |
| PGN_1411 | putative N-ethylammelne chlorohydrolase                           | * |
| PGN_1413 | conserved hypothetical protein                                    | * |
| PGN_1414 | hypothetical protein                                              |   |
| PGN_1421 | hypothetical protein                                              |   |
| PGN_1422 | putative partial DNA-binding protein, histone-like family         | * |
| PGN_1423 | putative partial DNA-binding protein, histone-like family         | * |
| PGN_1424 | putative partial Type II restriction enzyme                       |   |
| PGN_1425 | putative partial Type II restriction enzyme                       |   |
| PGN_1426 | adenine-specific methyltransferase                                |   |
| PGN_1427 | hypothetical protein                                              |   |
| PGN_1438 | hypothetical protein                                              |   |
| PGN_1439 | hypothetical protein                                              |   |
| PGN_1465 | hypothetical protein                                              |   |
| PGN_1473 | hypothetical protein                                              |   |
| PGN_1477 | conserved hypothetical protein                                    | * |
| PGN_1483 | conserved hypothetical protein                                    | * |
| PGN_1502 | conserved hypothetical protein                                    | * |
| PGN_1507 | hypothetical protein                                              |   |
| PGN_1508 | hypothetical protein                                              |   |
| PGN_1515 | conserved hypothetical protein                                    | * |
| PGN_1523 | putative polysaccharide export outer membrane protein             | * |
| PGN_1524 | conserved hypothetical protein                                    | * |
| PGN_1531 | hypothetical protein                                              |   |
| PGN_1532 | conserved hypothetical protein                                    | * |
| PGN_1533 | putative carbonic anhydrase                                       |   |
| PGN_1534 | hypothetical protein                                              |   |
| PGN_1535 | hypothetical protein                                              |   |
| PGN_1536 | hypothetical protein                                              |   |
| PGN_1537 | probable cation efflux system protein                             | * |
| PGN_1538 | putative cation efflux system                                     | * |
| PGN_1539 | putative ABC transport system exported protein                    | * |
| PGN_1540 | putative ABC transport membrane protein                           | * |
| PGN_1541 | hypothetical protein                                              |   |
| PGN_1544 | conserved hypothetical protein                                    | * |
| PGN_1545 | hypothetical protein                                              |   |
| PGN_1558 | conserved hypothetical protein                                    | * |
| PGN_1559 | hypothetical protein                                              |   |
| PGN_1560 | conserved hypothetical protein                                    | * |
| PGN_1561 | conserved hypothetical protein                                    | * |
| PGN_1563 | hypothetical protein                                              |   |
| PGN_1577 | putative preprotein translocase SecE subunit                      | * |
| PGN_1583 | hypothetical protein                                              |   |
| PGN_1586 | hypothetical protein                                              |   |
| PGN_1592 | conserved hypothetical protein                                    | * |
| PGN_1607 | hypothetical protein                                              |   |
| PGN_1609 | hypothetical protein                                              |   |
| PGN_1620 | hypothetical protein                                              |   |
| PGN_1621 | conserved hypothetical protein                                    | * |
| PGN_1627 | probable 4-amino-4-deoxy-L-arabinose transferase                  |   |
| PGN_1629 | conserved hypothetical protein with integral membrane domain DUF6 | * |
| PGN_1632 | hypothetical protein                                              |   |
| PGN_1643 | conserved hypothetical protein                                    | * |
| PGN_1648 | putative 50S ribosomal protein L21                                | * |

|          |                                                       |   |
|----------|-------------------------------------------------------|---|
| PGN_1660 | conserved hypothetical protein                        | * |
| PGN_1663 | hypothetical protein                                  |   |
| PGN_1664 | conserved hypothetical protein                        | * |
| PGN_1665 | hypothetical protein                                  |   |
| PGN_1675 | conserved hypothetical protein                        | * |
| PGN_1684 | hypothetical protein                                  |   |
| PGN_1686 | hypothetical protein                                  |   |
| PGN_1687 | conserved hypothetical protein                        | * |
| PGN_1720 | hypothetical protein                                  |   |
| PGN_1728 | lysine-specific cysteine proteinase Kgp               | * |
| PGN_1732 | hypothetical protein                                  | * |
| PGN_1733 | hemagglutinin protein HagA                            | * |
| PGN_1740 | putative RNA polymerase ECF-type sigma factor         | * |
| PGN_1746 | cytochrome c nitrite reductase catalytic subunit NrFA | * |
| PGN_1747 | conserved hypothetical protein                        | * |
| PGN_1754 | hypothetical protein                                  |   |
| PGN_1765 | hypothetical protein                                  |   |
| PGN_1766 | conserved hypothetical protein                        | * |
| PGN_1769 | hypothetical protein                                  |   |
| PGN_1787 | probable 5-formyltetrahydrofolate cyclo-ligase        | * |
| PGN_1795 | conserved hypothetical protein                        | * |
| PGN_1796 | conserved hypothetical protein                        | * |
| PGN_1799 | hypothetical protein                                  | * |
| PGN_1809 | hypothetical protein                                  |   |
| PGN_1810 | hypothetical protein                                  |   |
| PGN_1816 | conserved hypothetical protein                        | * |
| PGN_1817 | conserved hypothetical protein                        | * |
| PGN_1818 | conserved hypothetical protein                        | * |
| PGN_1819 | hypothetical protein                                  |   |
| PGN_1820 | conserved hypothetical protein                        | * |
| PGN_1821 | conserved hypothetical protein                        | * |
| PGN_1822 | hypothetical protein                                  |   |
| PGN_1824 | hypothetical protein                                  | * |
| PGN_1825 | hypothetical protein                                  | * |
| PGN_1863 | 50S ribosomal protein L22                             | * |
| PGN_1879 | hypothetical protein                                  |   |
| PGN_1894 | conserved hypothetical protein                        | * |
| PGN_1897 | putative transport related membrane protein           | * |
| PGN_1898 | probable transport protein                            | * |
| PGN_1900 | hypothetical protein                                  |   |
| PGN_1902 | conserved hypothetical protein                        |   |
| PGN_1903 | putative adenine-specific DNA methyltransferase       |   |
| PGN_1908 | hypothetical protein                                  |   |
| PGN_1909 | conserved hypothetical protein                        | * |
| PGN_1912 | partial transposase in IS <i>Pg6</i>                  | * |
| PGN_1915 | conserved hypothetical protein                        | * |
| PGN_1923 | hypothetical protein                                  |   |
| PGN_1925 | conserved hypothetical protein                        | * |
| PGN_1927 | conserved hypothetical protein                        | * |
| PGN_1928 | conserved hypothetical protein                        | * |
| PGN_1929 | conserved hypothetical protein                        | * |
| PGN_1931 | conserved hypothetical protein                        | * |
| PGN_1932 | conserved hypothetical protein                        | * |
| PGN_1933 | conserved hypothetical protein                        | * |
| PGN_1934 | conserved hypothetical protein                        | * |
| PGN_1943 | putative polyprenyl synthetase                        | * |
| PGN_1950 | hypothetical protein                                  |   |
| PGN_1952 | hypothetical protein                                  |   |
| PGN_1956 | hypothetical protein                                  |   |
| PGN_1962 | conserved hypothetical protein                        |   |

|          |                                               |   |
|----------|-----------------------------------------------|---|
| PGN_1963 | conserved hypothetical protein                |   |
| PGN_1964 | probable CRISPR-associated helicase Cas3 core | * |
| PGN_1965 | hypothetical protein                          |   |
| PGN_1971 | hypothetical protein                          |   |
| PGN_1972 | conserved hypothetical protein                |   |
| PGN_1978 | conserved hypothetical protein                | * |
| PGN_1985 | probable N-acetylmuramoyl-L-alanine amidase   | * |
| PGN_1988 | conserved hypothetical protein                | * |
| PGN_2000 | hypothetical protein                          |   |
| PGN_2002 | conserved hypothetical protein                | * |
| PGN_2014 | cation efflux system protein                  | * |
| PGN_2027 | conserved hypothetical protein                | * |
| PGN_2032 | putative alpha-galactosidase                  | * |
| PGN_2036 | hypothetical protein                          |   |
| PGN_2046 | conserved hypothetical protein                | * |
| PGN_2047 | conserved hypothetical protein                | * |
| PGN_2063 | hypothetical protein                          |   |
| PGN_2084 | conserved hypothetical protein                | * |

---

\* these CDSs show significant sequence similarities to CDSs on the W83 chromosome, but do not fulfill the criterion for the 'conserved CDSs' that we defined in the present study (see the Materials and Methods section in the main text).

Supplementary Table 6. W83-specific CDSs

| PG No.    | product                                                      |   |
|-----------|--------------------------------------------------------------|---|
| PG0007    | hypothetical protein                                         |   |
| PG0008    | <i>ISPg5</i> transposase Orf2                                | * |
| PG0009    | <i>ISPg5</i> transposase Orf1                                |   |
| PG0019    | <i>ISPg4</i> transposase                                     | * |
| PGa0003   | hypothetical protein                                         | * |
| PG0040    | <i>ISPg5</i> transposase Orf1                                |   |
| PG0041    | <i>ISPg5</i> transposase Orf2                                | * |
| PG0050    | <i>ISPg4</i> , transposase                                   | * |
| PG0053    | hypothetical protein                                         | * |
| PG0065    | efflux transporter, RND family, MFP subunit                  | * |
| PG0068    | hypothetical protein                                         |   |
| PG0080    | hypothetical protein                                         | * |
| PG0085    | alpha-galactosidase                                          | * |
| PGa0007   | hypothetical protein similar to PG2076                       | * |
| PG0101    | hypothetical protein                                         | * |
| PGa0008   | hypothetical protein similar to PG1787                       | * |
| GPI locus |                                                              |   |
| PG0109    | hypothetical protein                                         |   |
| PG0110    | glycosyl transferase, group 1 family protein                 |   |
| PG0111    | capsular polysaccharide biosynthesis gene, putative          | * |
| PGa0009   | conserved hypothetical protein                               | * |
| PG0113    | conserved domain protein                                     |   |
| PG0114    | hypothetical protein                                         |   |
| PG0116    | conserved hypothetical protein                               | * |
| PG0117    | polysaccharide transport protein, putative                   | * |
| PG0118    | glycosyl transferase, group 2 family protein                 | * |
| PG0123    | hypothetical protein                                         | * |
| PG0132    | hypothetical protein                                         |   |
| PG0145    | hypothetical protein                                         |   |
| PG0161    | hypothetical protein                                         | * |
| PGa0012   | hypothetical protein                                         | * |
| PG0174    | pyridine nucleotide-disulphide oxidoreductase family protein | * |
| PGa0013   | partial Mfa1 fimbriin                                        | * |
| PG0177    | <i>ISPg4</i> , transposase                                   | * |
| PGa0014   | partial Mfa1 fimbriin                                        | * |
| PG0183    | lipoprotein, putative                                        | * |
| PG0185    | RagA protein                                                 | * |
| PG0186    | lipoprotein RagB                                             | * |
| PGa0015   | <i>ISPg6</i> , transposase, partial                          | * |
| PGa0016   | <i>ISPg6</i> , transposase, partial                          | * |
| PG0188    | lipoprotein, putative                                        | * |
| PG0197    | hypothetical protein                                         |   |
| PGa0017   | hypothetical protein similar to PG1426                       | * |
| PG0198    | conserved hypothetical protein                               | * |
| PG0218    | hypothetical protein                                         | * |
| PG0219    | conserved domain protein                                     |   |
| PG0221    | hypothetical protein                                         |   |
| PG0225    | <i>ISPg4</i> , transposase                                   | * |
| PG0240    | hydrolase, haloacid dehalogenase-like family                 | * |
| PG0246    | hypothetical protein                                         | * |
| PG0274    | hypothetical protein                                         |   |
| PG0278    | hypothetical protein                                         | * |
| PG0289    | hypothetical protein                                         | * |

|         |                                                             |   |
|---------|-------------------------------------------------------------|---|
| PG0297  | hypothetical protein                                        | * |
| PGa0021 | hypothetical protein similar to PG0297                      | * |
| PG0302  | hypothetical protein                                        | * |
| PG0314  | ribosomal protein L21                                       | * |
| PG0319  | hypothetical protein                                        | * |
| PG0333  | membrane protein, putative                                  | * |
| PG0340  | hypothetical protein                                        | * |
| PG0354  | hypothetical protein                                        |   |
| PG0371  | hypothetical protein                                        |   |
| PG0374  | hypothetical protein                                        |   |
| PG0382  | conserved hypothetical protein                              |   |
| PGa0023 | putative preprotein translocase SecE subunit                | * |
| PG0404  | hypothetical protein                                        | * |
| PG0408  | hypothetical protein                                        | * |
| PG0410  | hypothetical protein                                        |   |
| PG0422  | hypothetical protein                                        |   |
| PG0423  | hypothetical protein                                        | * |
| PG0426  | <i>ISPg5</i> , transposase Orf2                             | * |
| PG0427  | <i>ISPg5</i> , transposase Orf1                             |   |
| PG0428  | hypothetical protein                                        |   |
| PG0431  | hypothetical protein                                        |   |
| PG0436  | capsular polysaccharide transport protein, putative         | * |
| PG0437  | polysaccharide export protein, BexD/CtrA/VexA family        | * |
| PG0442  | hypothetical protein                                        |   |
| PG0447  | conserved hypothetical protein                              | * |
| PG0456  | PHP N-terminal domain protein                               |   |
| PG0457  | hypothetical protein                                        |   |
| PG0458  | <i>ISPg5</i> , transposase Orf2                             | * |
| PG0459  | <i>ISPg5</i> , transposase Orf1                             | * |
| PG0461  | <i>ISPg7</i> , transposase                                  |   |
| PG0466  | hypothetical protein                                        | * |
| PG0487  | <i>ISPg4</i> , transposase                                  | * |
| PG0492  | hypothetical protein                                        |   |
| PG0493  | hypothetical protein                                        | * |
| PG0494  | hypothetical protein                                        | * |
| PG0496  | hypothetical protein                                        |   |
| PG0499  | hypothetical protein                                        | * |
| PG0507  | hypothetical protein                                        |   |
| PG0536  | hypothetical protein                                        |   |
| PG0542  | hypothetical protein                                        |   |
| PG0543  | transcriptional regulator, putative                         | * |
| PG0544  | type I restriction-modification system, M subunit, putative |   |
| PG0545  | hypothetical protein                                        |   |
| PG0546  | conserved domain protein                                    | * |
| PG0554  | hypothetical protein                                        |   |
| PG0556  | hypothetical protein                                        |   |
| PG0557  | hypothetical protein                                        | * |
| PG0559  | chlorohydrolase family protein                              | * |
| PG0563  | hypothetical protein                                        |   |
| PG0564  | hypothetical protein                                        |   |
| PG0565  | hypothetical protein                                        |   |
| PG0590  | <i>ISPg5</i> , transposase Orf1                             | * |
| PG0591  | <i>ISPg5</i> , transposase Orf2                             | * |
| PG0605  | hypothetical protein                                        | * |
| PG0608  | hypothetical protein                                        |   |

|          |         |                                                                                                            |   |
|----------|---------|------------------------------------------------------------------------------------------------------------|---|
|          | PG0609  | hypothetical protein                                                                                       |   |
|          | PG0610  | hypothetical protein                                                                                       | * |
|          | PG0611  | lipoprotein, putative                                                                                      | * |
|          | PG0614  | hypothetical protein                                                                                       | * |
|          | PG0617  | hypothetical protein                                                                                       | * |
|          | PG0626  | hypothetical protein                                                                                       |   |
|          | PGa0028 | tonB-linked receptor Tlr, frame-shifted with PGN_0683                                                      | * |
|          | PGa0029 | tonB-linked receptor Tlr, frame-shifted with PGN_0683                                                      | * |
|          | PG0655  | hypothetical protein                                                                                       |   |
|          | PG0661  | hypothetical protein                                                                                       |   |
|          | PGa0030 | conserved hypothetical protein frame-shifted with PGN_0702                                                 | * |
|          | PGa0031 | conserved hypothetical protein with a phosphotransferase enzyme family domain, frame-shifted with PGN_0702 | * |
|          | PG0681  | hypothetical protein                                                                                       | * |
|          | PG0683  | ABC transporter, permease protein, putative                                                                | * |
|          | PG0700  | hypothetical protein                                                                                       | * |
|          | PG0717  | lipoprotein, putative                                                                                      | * |
|          | PG0718  | conserved hypothetical protein                                                                             |   |
|          | PG0719  | sensor histidine kinase                                                                                    |   |
|          | PG0722  | hypothetical protein                                                                                       | * |
|          | PG0723  | hypothetical protein                                                                                       |   |
|          | PG0727  | hypothetical protein                                                                                       |   |
|          | PG0741  | conserved hypothetical protein                                                                             |   |
|          | PG0742  | antigen PgaA                                                                                               |   |
|          | PG0767  | 4-alpha-glucanotransferase                                                                                 | * |
|          | PG0769  | fibronectin type III domain protein                                                                        | * |
|          | PG0770  | hypothetical protein                                                                                       | * |
|          | PG0771  | hypothetical protein                                                                                       |   |
|          | PG0774  | hypothetical protein                                                                                       | * |
|          | PG0786  | hypothetical protein                                                                                       |   |
|          | PG0810  | hypothetical protein                                                                                       | * |
| large    | PG0814  | hypothetical protein                                                                                       |   |
| mobile   | PG0815  | hypothetical protein                                                                                       |   |
| element  | PG0816  | hypothetical protein                                                                                       | * |
| region I | PG0819  | integrase                                                                                                  | * |
|          | PG0820  | integrase                                                                                                  | * |
|          | PG0821  | lipoprotein, putative                                                                                      | * |
|          | PG0822  | hypothetical protein                                                                                       |   |
|          | PG0823  | conserved hypothetical protein                                                                             |   |
|          | PG0824  | conserved hypothetical protein                                                                             |   |
|          | PG0826  | transcriptional regulator, AraC family                                                                     | * |
|          | PG0829  | hypothetical protein                                                                                       | * |
|          | PG0831  | hypothetical protein                                                                                       | * |
|          | PG0832  | hypothetical protein                                                                                       |   |
|          | PG0833  | conserved hypothetical protein                                                                             |   |
|          | PG0834  | hypothetical protein                                                                                       |   |
|          | PG0835  | hypothetical protein                                                                                       |   |
|          | PGa0043 | integrase                                                                                                  | * |
|          | PG0838  | integrase                                                                                                  | * |
|          | PG0839  | conserved hypothetical protein                                                                             |   |
|          | PG0840  | hypothetical protein                                                                                       |   |
|          | PG0841  | mobilizable transposon, excision protein, putative                                                         | * |
|          | PG0842  | mobilizable transposon, hypothetical protein, putative                                                     | * |
|          | PG0843  | hypothetical protein                                                                                       |   |
|          | PG0844  | hypothetical protein                                                                                       |   |

|         |                                                               |   |
|---------|---------------------------------------------------------------|---|
| PGa0046 | probable integrase                                            | * |
| PG0847  | conserved domain protein                                      | * |
| PG0848  | hypothetical protein                                          |   |
| PG0849  | hypothetical protein                                          |   |
| PG0850  | DNA binding protein, excisionase family, putative             |   |
| PG0851  | conserved hypothetical protein                                | * |
| PG0853  | DNA-binding protein, histone-like family                      | * |
| PG0854  | hypothetical protein                                          |   |
| PG0855  | hypothetical protein                                          |   |
| PG0856  | hypothetical protein                                          |   |
| PG0857  | transcriptional regulator, putative                           |   |
| PG0858  | conserved hypothetical protein                                |   |
| PG0859  | conserved hypothetical protein                                |   |
| PG0860  | transcriptional regulator, putative                           |   |
| PG0861  | helicase, SNF2/RAD54 family                                   | * |
| PG0862  | type IIS restriction endonuclease, putative                   |   |
| PG0864  | site-specific recombinase, resolvase family                   |   |
| PG0866  | hypothetical protein                                          |   |
| PG0867  | hypothetical protein                                          |   |
| PG0868  | mobilization protein                                          | * |
| PG0869  | mobilization protein                                          | * |
| PG0870  | conserved hypothetical protein                                |   |
| PG0871  | hypothetical protein                                          |   |
| PG0872  | mobilizable transposon, Xis protein                           |   |
| PG0873  | mobilizable transposon, TnpC protein                          |   |
| PG0874  | mobilizable transposon, Int protein                           | * |
| PG0875  | mobilizable transposon, TnpA protein                          |   |
| <hr/>   |                                                               |   |
| PG0877  | hypothetical protein                                          | * |
| PG0879  | hypothetical protein                                          | * |
| PG0880  | bacterioferritin comigratory protein                          | * |
| PG0888  | hypothetical protein                                          |   |
| PG0915  | conserved hypothetical protein                                | * |
| PG0918  | hypothetical protein                                          | * |
| PG0929  | hypothetical protein                                          |   |
| PGa0049 | hypothetical protein                                          | * |
| PG0938  | calcium-transporting ATPase                                   | * |
| PG0942  | <i>ISPg5</i> , transposase Orf1                               | * |
| PG0943  | <i>ISPg5</i> , transposase Orf2                               | * |
| PG0954  | TPR domain protein                                            | * |
| PG0955  | hypothetical protein                                          | * |
| PG0958  | ribonuclease BN, putative                                     | * |
| PG0970  | <i>ISPg4</i> , transposase                                    | * |
| PG0971  | McrBC restriction endonuclease system, McrB subunit, putative |   |
| PG0972  | conserved hypothetical protein                                |   |
| PG0979  | hypothetical protein                                          |   |
| PG0982  | TPR domain protein                                            | * |
| PG0984  | hypothetical protein                                          |   |
| PG0994  | hypothetical protein                                          |   |
| PG0997  | transcriptional regulator, putative                           | * |
| PG1000  | hypothetical protein                                          | * |
| PG1002  | hypothetical protein                                          | * |
| PG1014  | TPR domain protein                                            | * |
| PG1018  | hypothetical protein                                          | * |
| PG1021  | hypothetical protein                                          |   |
| PG1024  | hypothetical protein                                          |   |

|         |                                                            |   |
|---------|------------------------------------------------------------|---|
| PG1025  | conserved domain protein                                   |   |
| PG1026  | hypothetical protein                                       |   |
| PG1027  | hypothetical protein                                       |   |
| PG1028  | TPR domain protein                                         | * |
| PG1033  | conserved hypothetical protein                             | * |
| PG1055  | thiol protease                                             |   |
| PG1059  | hypothetical protein                                       | * |
| PG1061  | <i>ISPg6</i> , transposase                                 | * |
| PG1065  | dihydroorotate dehydrogenase                               | * |
| PG1071  | conserved hypothetical protein                             | * |
| PG1083  | hypothetical protein                                       | * |
| PG1102  | hypothetical protein                                       | * |
| PG1107  | hypothetical protein                                       |   |
| PG1108  | hypothetical protein                                       |   |
| PG1109  | mobilization protein                                       |   |
| PG1110  | hypothetical protein                                       |   |
| PGa0058 | conserved hypothetical protein                             |   |
| PGa0059 | conserved hypothetical protein                             |   |
| PG1112  | hypothetical protein                                       |   |
| PG1113  | integrase                                                  | * |
| PG1130  | TPR domain protein                                         | * |
| PG1142  | exopolysaccharide synthesis-related protein                | * |
| PG1148  | hypothetical protein                                       |   |
| PG1150  | hypothetical protein                                       |   |
| PG1152  | hypothetical protein                                       |   |
| PG1153  | hypothetical protein                                       |   |
| PG1154  | hypothetical protein                                       |   |
| PG1155  | ADP-heptose--LPS heptosyltransferase, putative             | * |
| PG1166  | hypothetical protein                                       |   |
| PG1167  | hypothetical protein                                       |   |
| PG1169  | hypothetical protein                                       | * |
| PG1171  | oxidoreductase, putative                                   | * |
| PG1196  | hypothetical protein                                       | * |
| PG1198  | hypothetical protein                                       | * |
| PG1199  | hypothetical protein                                       | * |
| PG1200  | hypothetical protein                                       |   |
| PGa0065 | putative transcriptional regulator                         | * |
| PG1202  | hypothetical protein                                       |   |
| PG1203  | transcriptional regulator, putative                        | * |
| PG1205  | DNA-binding protein, histone-like family                   | * |
| PG1206  | hypothetical protein                                       |   |
| PG1207  | hypothetical protein                                       |   |
| PG1215  | lipoprotein protein, putative                              | * |
| PG1218  | hypothetical protein                                       | * |
| PG1222  | hypothetical protein                                       |   |
| PG1229  | hypothetical protein                                       | * |
| PG1249  | 1-acyl-sn-glycerol-3-phosphate acetyltransferase, putative | * |
| PG1251  | hypothetical protein                                       | * |
| PG1250  | hypothetical protein                                       |   |
| PG1261  | <i>ISPg4</i> , transposase                                 | * |
| PG1266  | hypothetical protein                                       | * |
| PG1268  | hypothetical protein                                       |   |
| PG1311  | conserved hypothetical protein                             | * |
| PG1325  | hypothetical protein                                       | * |
| PG1332  | NAD(P) transhydrogenase, beta subunit                      | * |



|           |        |                                                             |   |
|-----------|--------|-------------------------------------------------------------|---|
|           | PG1341 | hypothetical protein                                        | * |
|           | PG1356 | hypothetical protein                                        | * |
|           | PG1363 | hypothetical protein                                        | * |
|           | PG1373 | hypothetical protein                                        |   |
|           | PG1388 | hypothetical protein                                        | * |
|           | PG1398 | hypothetical protein                                        | * |
|           | PG1402 | AP endonuclease domain protein                              | * |
|           | PG1419 | IS <i>Pg5</i> , transposase Orf1                            | * |
|           | PG1420 | IS <i>Pg5</i> , transposase Orf2                            | * |
|           | PG1429 | hypothetical protein                                        |   |
|           | PG1433 | hydrolase                                                   | * |
| large     | PG1435 | integrase                                                   | * |
| mobile    | PG1436 | ATPase, putative                                            |   |
| element   | PG1439 | hypothetical protein                                        |   |
| region II | PG1440 | hypothetical protein                                        |   |
|           | PG1441 | lysozyme-related protein                                    | * |
|           | PG1442 | hypothetical protein                                        | * |
|           | PG1444 | hypothetical protein                                        | * |
|           | PG1447 | transcriptional regulator, AraC family                      | * |
|           | PG1449 | conserved hypothetical protein                              |   |
|           | PG1450 | conserved hypothetical protein                              |   |
|           | PG1451 | conserved hypothetical protein                              |   |
|           | PG1452 | lipoprotein, putative                                       | * |
|           | PG1453 | integrase                                                   | * |
|           | PG1454 | integrase                                                   | * |
|           | PG1457 | hypothetical protein                                        | * |
|           | PG1459 | hypothetical protein                                        |   |
|           | PG1465 | hypothetical protein                                        |   |
|           | PG1466 | hypothetical protein                                        |   |
|           | PG1467 | methlytransferase, UbiE/COQ5 family                         |   |
|           | PG1469 | type I restriction-modification system, M subunit, putative |   |
|           | PG1470 | hypothetical protein                                        | * |
|           | PG1471 | conserved hypothetical protein                              |   |
|           | PG1472 | hypothetical protein                                        |   |
|           | PG1473 | conjugative transposon protein TraQ                         | * |
|           | PG1474 | conjugative transposon protein TraO                         | * |
|           | PG1475 | conjugative transposon protein TraN                         | * |
|           | PG1476 | conjugative transposon protein TraM                         | * |
|           | PG1477 | hypothetical protein                                        |   |
|           | PG1478 | conjugative transposon protein TraK                         | * |
|           | PG1479 | conjugative transposon protein TraJ                         | * |
|           | PG1480 | conjugative transposon protein TraI                         | * |
|           | PG1481 | conjugative transposon protein TraG                         | * |
|           | PG1482 | conjugative transposon protein TraF                         | * |
|           | PG1483 | conjugative transposon protein TraE                         | * |
|           | PG1484 | hypothetical protein                                        |   |
|           | PG1485 | conjugative transposon protein TraC                         |   |
|           | PG1486 | conjugative transposon protein TraA                         | * |
|           | PG1487 | hypothetical protein                                        |   |
|           | PG1488 | hypothetical protein                                        | * |
|           | PG1489 | conserved hypothetical protein                              | * |
|           | PG1490 | TraG family protein                                         | * |
|           | PG1494 | conserved hypothetical protein                              | * |
|           | PG1495 | DNA topoisomerase III                                       | * |
|           | PG1496 | hypothetical protein                                        | * |

|         |                                                                                                 |   |
|---------|-------------------------------------------------------------------------------------------------|---|
| PG1497  | DNA-binding protein, histone-like family                                                        | * |
| PG1498  | hypothetical protein                                                                            |   |
| PG1499  | hypothetical protein                                                                            |   |
| PG1500  | conserved domain protein                                                                        | * |
| PG1501  | transcriptional regulator, TetR family                                                          |   |
| PG1503  | LytB-related protein                                                                            |   |
| PG1504  | NAD dependent protein                                                                           | * |
| PG1505  | radical SAM domain protein                                                                      |   |
| PG1507  | hypothetical protein                                                                            |   |
| PG1508  | hypothetical protein                                                                            |   |
| PG1509  | HAD-superfamily hydrolase, subfamily IA, variant 1 family protein                               |   |
| PG1510  | hypothetical protein                                                                            |   |
| PG1511  | hypothetical protein                                                                            |   |
| PG1512  | conserved domain protein                                                                        | * |
| PG1513  | phosphoribosyltransferase, putative/phosphoglycerate mutase family protein                      |   |
| PG1514  | glycerol dehydrogenase-related protein                                                          |   |
| PG1515  | ribulose bisphosphate carboxylase-related protein                                               |   |
| PG1516  | hypothetical protein                                                                            |   |
| PGa0078 | <i>ISPg3</i> , transposase, partial                                                             | * |
| PG1519  | hypothetical protein                                                                            | * |
| PG1521  | O-succinylbenzoic acid--CoA ligase                                                              |   |
| PG1522  | mandelate racemase/muconate lactonizing enzyme family protein                                   |   |
| PG1523  | naphthoate synthase                                                                             | * |
| PG1524  | 2-succinyl-6-hydroxy-2,4-cyclohexadiene-1-carboxylic acid synthase/2-oxoglutarate decarboxylase |   |
| PG1525  | isochorismate synthase, putative                                                                | * |
| PG1526  | conserved hypothetical protein                                                                  | * |
| PG1527  | hypothetical protein                                                                            |   |
| PG1528  | conserved hypothetical protein                                                                  |   |
| PG1529  | hypothetical protein                                                                            |   |
| PG1530  | conserved domain protein                                                                        |   |
| PG1532  | hypothetical protein                                                                            |   |
| PG1533  | Toprim domain protein                                                                           | * |
| PG1534  | conserved domain protein                                                                        |   |
| <hr/>   |                                                                                                 |   |
| PG1537  | conserved hypothetical protein                                                                  | * |
| PG1546  | hypothetical protein                                                                            |   |
| PG1551  | HmuY protein                                                                                    | * |
| PG1573  | transcriptional regulator, Crp family                                                           | * |
| PG1574  | hypothetical protein                                                                            | * |
| PG1591  | conserved hypothetical protein                                                                  |   |
| PG1617  | hypothetical protein                                                                            | * |
| PG1630  | hypothetical protein                                                                            | * |
| PG1638  | thioredoxin family protein                                                                      | * |
| PG1644  | <i>ISPg5</i> , transposase Orf2                                                                 | * |
| PG1645  | <i>ISPg5</i> , transposase Orf1                                                                 | * |
| PG1649  | hypothetical protein                                                                            |   |
| PG1655  | hypothetical protein                                                                            | * |
| PG1658  | <i>ISPg4</i> , transposase                                                                      | * |
| PG1661  | hypothetical protein                                                                            |   |
| PG1662  | hypothetical protein                                                                            | * |
| PG1671  | hypothetical protein                                                                            | * |
| PG1673  | <i>ISPg4</i> , transposase                                                                      | * |
| PGa0084 | probable partial hemagglutinin-related protein                                                  | * |
| PG1675  | hypothetical protein                                                                            |   |

|         |                                                        |   |
|---------|--------------------------------------------------------|---|
| PGa0085 | putative ABC-type transporter ATP-binding protein      | * |
| PG1685  | hypothetical protein                                   |   |
| PG1695  | hypothetical protein                                   | * |
| PG1709  | IS <i>Pg5</i> , transposase Orf1                       | * |
| PG1710  | IS <i>Pg5</i> , transposase Orf2                       | * |
| PGa0087 | putative partial transcriptional repressor             | * |
| PGa0088 | putative partial transcriptional repressor             | * |
| PG1738  | hypothetical protein                                   | * |
| PG1739  | conserved domain protein                               | * |
| PG1742  | hypothetical protein                                   |   |
| PG1786  | hypothetical protein                                   | * |
| PG1787  | hypothetical protein                                   | * |
| PG1799  | hypothetical protein                                   | * |
| PG1811  | hypothetical protein                                   |   |
| PG1818  | hypothetical protein                                   | * |
| PG1819  | hypothetical protein                                   | * |
| PG1820  | cytochrome c nitrite reductase, catalytic subunit NrfA | * |
| PG1827  | RNA polymerase sigma-70 factor, ECF subfamily          | * |
| PG1837  | hemagglutinin protein HagA                             | * |
| PGa0090 | lysine-specific cysteine proteinase                    | * |
| PG1854  | 5-formyltetrahydrofolate cyclo-ligase family protein   | * |
| PG1862  | hypothetical protein                                   | * |
| PG1863  | hypothetical protein                                   | * |
| PG1864  | leucine-rich protein                                   | * |
| PG1866  | hypothetical protein                                   |   |
| PG1869  | hypothetical protein                                   |   |
| PG1871  | hypothetical protein                                   | * |
| PG1889  | hypothetical protein                                   | * |
| PG1890  | lipoprotein, putative                                  | * |
| PG1891  | hypothetical protein                                   | * |
| PGa0093 | hypothetical protein                                   | * |
| PG1892  | hypothetical protein                                   | * |
| PG1894  | hypothetical protein                                   |   |
| PG1933  | ribosomal protein L22                                  | * |
| PGa0101 | partial chloride channel protein                       | * |
| PG1966  | conserved hypothetical protein                         | * |
| PG1968  | hypothetical protein                                   |   |
| PG1969  | hypothetical protein                                   | * |
| PG1970  | hypothetical protein                                   |   |
| PG1978  | hypothetical protein                                   |   |
| PG1979  | hypothetical protein                                   | * |
| PG1982  | CRISPR-associated protein Cas1                         | * |
| PG1983  | CRISPR-associated protein, TM1791 family               | * |
| PG1984  | hypothetical protein                                   | * |
| PG1986  | CRISPR-associated protein, TM1793 family               | * |
| PG1987  | CRISPR-associated protein, TM1811 family               | * |
| PG1988  | hypothetical protein                                   | * |
| PG1989  | hypothetical protein                                   | * |
| PG1998  | polyprenyl synthetase                                  | * |
| PG2016  | CRISPR-associated helicase Cas3                        | * |
| PG2017  | hypothetical protein                                   |   |
| PG2018  | hypothetical protein                                   |   |
| PG2019  | hypothetical protein                                   |   |
| PG2031  | hypothetical protein                                   | * |
| PG2038  | N-acetylmuramoyl-L-alanine amidase, putative           | * |

|         |                                          |   |
|---------|------------------------------------------|---|
| PG2042  | thioredoxin family protein               | * |
| PGa0105 | <i>ISPg2</i> , transposase, partial      | * |
| PG2057  | <i>ISPg5</i> , transposase Orf2          | * |
| PG2058  | <i>ISPg5</i> , transposase Orf1          | * |
| PG2075  | hypothetical protein                     | * |
| PG2076  | hypothetical protein                     | * |
| PG2098  | hypothetical protein                     | * |
| PG2100  | immunoreactive 63 kDa antigen PG102      | * |
| PG2104  | hypothetical protein                     | * |
| PG2105  | lipoprotein, putative                    | * |
| PG2111  | ThiS protein                             | * |
| PG2112  | hypothetical protein                     | * |
| PGa0108 | hypothetical protein                     | * |
| PG2114  | hypothetical protein                     | * |
| PG2128  | <i>ISPg5</i> , transposase Orf2          | * |
| PG2129  | <i>ISPg5</i> , transposase Orf1          | * |
| PG2132  | fimbriin                                 | * |
| PG2133  | lipoprotein, putative                    | * |
| PG2134  | lipoprotein, putative                    | * |
| PG2135  | lipoprotein, putative                    | * |
| PG2136  | hypothetical protein                     | * |
| PG2139  | hypothetical protein                     | * |
| PG2152  | DNA-binding protein, histone-like family | * |
| PG2166  | hypothetical protein                     | * |
| PG2186  | transcriptional regulator, putative      | * |
| PG2194  | <i>ISPg4</i> , transposase               | * |
| PG2208  | hypothetical protein                     | * |
| PG2220  | hypothetical protein                     | * |

---

\* these CDSs show significant sequence similarities to CDSs on the ATCC 33277 chromosome, but do not fulfill the criterion for the 'conserved CDSs' that we defined in the present study (see the Materials and Methods section in the main text).

Supplementary Table 7. IS and MITEs of W83 genome in this study

| insertion sequence        | start | stop    | strand  | annotation <sup>a</sup> |         |
|---------------------------|-------|---------|---------|-------------------------|---------|
| <i>ISPg1_01</i> (partial) |       | 62287   | 62556   | +                       |         |
| <i>ISPg1_02</i> (partial) |       | 62562   | 63281   | +                       | IS1.1A  |
| <i>ISPg1_03</i>           |       | 216437  | 217774  | +                       | IS1.2   |
| <i>ISPg1_04</i> (partial) |       | 298868  | 299174  | -                       |         |
| <i>ISPg1_05</i>           |       | 501972  | 503309  | +                       | IS1.3   |
| <i>ISPg1_06</i>           |       | 605930  | 607267  | -                       | IS1.4   |
| <i>ISPg1_07</i> (partial) |       | 811059  | 811778  | -                       | IS1.5   |
| <i>ISPg1_08</i> (partial) |       | 811784  | 812245  | -                       | IS1.5   |
| <i>ISPg1_09</i> (partial) |       | 814725  | 815186  | +                       | IS1.6   |
| <i>ISPg1_10</i> (partial) |       | 815192  | 815911  | +                       | IS1.6   |
| <i>ISPg1_11</i> (partial) |       | 873736  | 873915  | -                       |         |
| <i>ISPg1_12</i> (partial) |       | 873938  | 874162  | -                       |         |
| <i>ISPg1_13</i> (partial) |       | 874251  | 874751  | -                       |         |
| <i>ISPg1_14</i> (partial) |       | 874839  | 875693  | -                       |         |
| <i>ISPg1_15</i>           |       | 882006  | 883343  | -                       | IS1.7   |
| <i>ISPg1_16</i> (partial) |       | 905767  | 906634  | -                       | IS1.8   |
| <i>ISPg1_17</i> (partial) |       | 906640  | 907101  | -                       | IS1.8   |
| <i>ISPg1_18</i> (partial) |       | 912908  | 913369  | +                       | IS1.9   |
| <i>ISPg1_19</i> (partial) |       | 913375  | 914094  | +                       | IS1.9   |
| <i>ISPg1_20</i> (partial) |       | 1000353 | 1001219 | -                       | IS1.10  |
| <i>ISPg1_21</i> (partial) |       | 1001225 | 1001686 | -                       | IS1.10  |
| <i>ISPg1_22</i> (partial) |       | 1004290 | 1005057 | -                       |         |
| <i>ISPg1_23</i> (partial) |       | 1049243 | 1049668 | -                       |         |
| <i>ISPg1_24</i> (partial) |       | 1049757 | 1050557 | -                       |         |
| <i>ISPg1_25</i>           |       | 1093024 | 1094361 | -                       | IS1.11  |
| <i>ISPg1_26</i>           |       | 1257737 | 1259074 | -                       | IS1.12  |
| <i>ISPg1_27</i>           |       | 1275418 | 1276755 | -                       | IS1.13  |
| <i>ISPg1_28</i> (partial) |       | 1304317 | 1305183 | -                       | IS1.14  |
| <i>ISPg1_29</i> (partial) |       | 1305189 | 1305650 | -                       | IS1.14  |
| <i>ISPg1_30</i>           |       | 1319569 | 1320906 | +                       | IS1.15  |
| <i>ISPg1_31</i> (partial) |       | 1398787 | 1399674 | +                       |         |
| <i>ISPg1_32</i> (partial) |       | 1429734 | 1430600 | -                       | IS1.16A |
| <i>ISPg1_33</i> (partial) |       | 1430606 | 1430956 | -                       | IS1.16A |
| <i>ISPg1_34</i> (partial) |       | 1463773 | 1464234 | +                       | IS1.17  |
| <i>ISPg1_35</i> (partial) |       | 1464240 | 1464959 | +                       | IS1.17  |
| <i>ISPg1_36</i> (partial) |       | 1481478 | 1482344 | -                       | IS1.18  |
| <i>ISPg1_37</i> (partial) |       | 1482350 | 1482811 | -                       | IS1.18  |
| <i>ISPg1_38</i>           |       | 1532319 | 1533656 | +                       | IS1.19  |
| <i>ISPg1_39</i>           |       | 1706131 | 1707468 | -                       | IS1.20  |
| <i>ISPg1_40</i> (partial) |       | 1945179 | 1945640 | +                       |         |
| <i>ISPg1_41</i> (partial) |       | 1945646 | 1945915 | +                       |         |
| <i>ISPg1_42</i>           |       | 2005442 | 2006779 | +                       | IS1.21  |
| <i>ISPg1_43</i> (partial) |       | 2009079 | 2010265 | -                       | IS1.22  |
| <i>ISPg1_44</i> (partial) |       | 2101270 | 2101989 | -                       | IS1.23  |
| <i>ISPg1_45</i> (partial) |       | 2101995 | 2102456 | -                       | IS1.23  |
| <i>ISPg1_46</i> (partial) |       | 2156466 | 2156783 | +                       |         |
| <i>ISPg1_47</i> (partial) |       | 2156789 | 2157508 | +                       |         |
| <i>ISPg1_48</i> (partial) |       | 2274557 | 2274886 | +                       | IS1.24A |
| <i>ISPg1_49</i> (partial) |       | 2275269 | 2275988 | +                       | IS1.24B |
| <i>ISPg1_50</i> (partial) |       | 2299564 | 2300430 | -                       | IS1.25  |
| <i>ISPg1_51</i> (partial) |       | 2300436 | 2300897 | -                       | IS1.25  |
| <i>ISPg2_01</i>           |       | 308933  | 310139  | +                       | IS2.1   |

|                       |         |         |        |                         |
|-----------------------|---------|---------|--------|-------------------------|
| ISPg2_02              | 927843  | 929049  | -      | IS2.2                   |
| ISPg2_03 (partial)    | 1269659 | 1269922 | -      |                         |
| ISPg2_04              | 1430943 | 1432149 | +      | IS2.3                   |
| ISPg2_05              | 1831177 | 1832383 | -      | IS2.4                   |
| ISPg2_06 (partial)    | 2153955 | 2154260 | -      |                         |
| ISPg2_07 (partial)    | 2229726 | 2230037 | -      |                         |
| ISPg2_08              | 2283292 | 2284498 | -      | IS2.5                   |
| ISPg3_01              | 230914  | 231983  | +      | IS3.1                   |
| ISPg3_02              | 293939  | 295008  | -      | IS3.2                   |
| ISPg3_03 (partial)    | 336207  | 336545  | -      |                         |
| ISPg3_04              | 852831  | 853900  | +      |                         |
| ISPg3_05 (partial)    | 1094473 | 1095388 | +      | IS3.4B                  |
| ISPg3_06              | 1339809 | 1340878 | -      | IS3.5                   |
| ISPg3_07 (partial)    | 1594936 | 1595556 | -      |                         |
| ISPg3_08 (partial)    | 2004988 | 2005261 | -      | IS3.6A                  |
| ISPg3_09 (partial)    | 2006695 | 2007400 | -      | IS3.6B                  |
| ISPg4_01              | 22050   | 23443   | +      | IS4.1                   |
| ISPg4_02              | 60926   | 62319   | +      | IS4.2                   |
| ISPg4_03              | 199096  | 200490  | +      | IS4.3                   |
| ISPg4_04              | 258469  | 259863  | -      | IS4.4                   |
| ISPg4_05              | 526260  | 527654  | -      | IS4.5                   |
| ISPg4_06              | 1029615 | 1031009 | +      | IS4.6                   |
| ISPg4_07              | 1338381 | 1339774 | +      | IS4.7                   |
| ISPg4_08              | 1741731 | 1743125 | -      | IS4.8                   |
| ISPg4_09              | 1758398 | 1759791 | +      | IS4.9                   |
| ISPg4_10              | 2300946 | 2302339 | -      | IS4.10                  |
| ISPg5_01              | 7070    | 8583    | -      | IS5.1                   |
| ISPg5_02              | 48047   | 49560   | +      | IS5.2                   |
| ISPg5_03              | 464144  | 465658  | -      | IS5.3                   |
| ISPg5_04 (partial)    | 500509  | 501984  | -      | IS5.4A                  |
| ISPg5_05              | 648155  | 649666  | +      | IS5.5                   |
| ISPg5_06              | 1002184 | 1003695 | +      | IS5.6                   |
| ISPg5_07              | 1505117 | 1506630 | +      | IS5.7                   |
| ISPg5_08              | 1724666 | 1726179 | -      | IS5.8                   |
| ISPg5_09              | 1795028 | 1796541 | +      | IS5.9                   |
| ISPg5_10              | 2154747 | 2156507 | -      | IS5.10                  |
| ISPg5_11              | 2233852 | 2235365 | -      | IS5.11                  |
| ISPg6_01 (partial)    | 223284  | 223466  | -      |                         |
| ISPg6_02 (partial)    | 223576  | 224003  | -      |                         |
| ISPg6_03              | 1128807 | 1129945 | -      | IS6.1                   |
| ISPg7_01              | 503521  | 504948  | -      | IS7.1                   |
| MITEs                 | start   | stop    | strand | annotation <sup>a</sup> |
| MITE239_01            | 36482   | 36720   | +      | MITE 239.1              |
| MITE239_02            | 1481023 | 1481261 | -      | MITE 239.2              |
| MITE239_03            | 2154829 | 2155067 | +      | MITE 239.3              |
| MITE239_04            | 2224966 | 2225204 | -      | MITE 239.4              |
| MITE239_05            | 2274870 | 2275108 | -      | MITE 239.5              |
| MITEPgRS_01 (partial) | 105331  | 105419  | +      |                         |
| MITEPgRS_02           | 242476  | 243166  | +      | MITE 464.1              |

|                                |         |         |   |             |
|--------------------------------|---------|---------|---|-------------|
| MITE <i>PgRS</i> _03           | 270233  | 270729  | + | MITE 464.2  |
| MITE <i>PgRS</i> _04 (partial) | 389531  | 389640  | + |             |
| MITE <i>PgRS</i> _05           | 607401  | 608292  | + | MITE 464.3  |
| MITE <i>PgRS</i> _06 (partial) | 627762  | 627886  | - |             |
| MITE <i>PgRS</i> _07           | 657919  | 658626  | - | MITE 464.4  |
| MITE <i>PgRS</i> _08           | 693460  | 694530  | - | MITE 464.5  |
| MITE <i>PgRS</i> _09           | 795445  | 795794  | + |             |
| MITE <i>PgRS</i> _10           | 1036691 | 1037352 | + | MITE 464.6  |
| MITE <i>PgRS</i> _11 (partial) | 1237433 | 1238047 | + | MITE 464.7  |
| MITE <i>PgRS</i> _12           | 1264613 | 1265338 | - | MITE 464.8  |
| MITE <i>PgRS</i> _13 (partial) | 1327845 | 1327901 | + |             |
| MITE <i>PgRS</i> _14           | 1371317 | 1372126 | + | MITE 464.9  |
| MITE <i>PgRS</i> _15           | 1391676 | 1392139 | - | MITE 464.13 |
| MITE <i>PgRS</i> _16           | 1419684 | 1420309 | + | MITE 464.10 |
| MITE <i>PgRS</i> _17 (partial) | 1454999 | 1455105 | + |             |
| MITE <i>PgRS</i> _18 (partial) | 1511717 | 1511774 | + |             |
| MITE <i>PgRS</i> _19           | 1710996 | 1711798 | - | MITE 464.11 |
| MITE <i>PgRS</i> 20            | 1771774 | 1772019 | + |             |
| MITE <i>PgRS</i> _21           | 1785243 | 1785964 | - | MITE 464.12 |
| <hr/>                          |         |         |   |             |
| MITE700_01                     | 275682  | 276358  | + | MITE 700.1  |
| MITE700_02                     | 953354  | 954047  | + | MITE 700.2  |
| MITE700_03                     | 1253850 | 1254255 | + |             |
| MITE700_04                     | 1273283 | 1274000 | - | MITE 700.3  |
| MITE700_05 (partial)           | 1377896 | 1378504 | + | MITE 700.4  |
| MITE700_06                     | 1751167 | 1751840 | + | MITE 700.5  |
| MITE700_07 (partial)           | 1936901 | 1937224 | - | MITE 700.6  |
| MITE700_08                     | 1978319 | 1979006 | + | MITE 700.7  |
| MITE700_09                     | 2045771 | 2046225 | + | MITE 700.8  |

a, annotation in the genome sequence of W83 deposited in the GenBank database (accession number AE015924)

Supplementary Table 8. Quantification of the expression level of *kgp* and *glk* by real-time PCR

| strain     | <i>kgp</i> * | <i>glk</i> * |
|------------|--------------|--------------|
| ATCC 33277 | 2.14E-12     | 1.66E-13     |
| W83        | 1.11E-12     | 3.33E-13     |
| TDC60      | 1.53E-12     | 2.26E-13     |
| TDC117     | 2.51E-12     | 2.05E-13     |
| TDC275     | 1.48E-12     | 2.17E-13     |
| SU63       | 1.24E-12     | 2.64E-13     |
| GAI7802    | 1.17E-12     | 2.37E-13     |

\*, amount of mRNA relative to the 16S rRNA.
